# Supplementary material for: Low-/No-Calorie Sweeteners: A Review of Global Intakes
Source: Nutrients. 2018 Mar 15;10(3):357. doi: 10.3390/nu10030357 (PMC5872775; doi:10.3390/nu10030357)
Supplement: Supplementary file 1 [file nutrients-10-00357-s001.pdf]

**Table S1.** Methodologies Utilized for Intake Assessments Conducted for Low-/No-Calorie Sweeteners in Asia.

| Country Reference                      | Population Group Examined ( <i>n</i> )                                                                                                                        | Sweeteners Investigated                                                                                                                                                                                                                                                                | Food Consumption Data                                                                                              | Chemical Data                                                                                                                                                                                                       |                                                                        |                                                                        | Assessment Model(s)                                                                                                                                                                               |
|----------------------------------------|---------------------------------------------------------------------------------------------------------------------------------------------------------------|----------------------------------------------------------------------------------------------------------------------------------------------------------------------------------------------------------------------------------------------------------------------------------------|--------------------------------------------------------------------------------------------------------------------|---------------------------------------------------------------------------------------------------------------------------------------------------------------------------------------------------------------------|------------------------------------------------------------------------|------------------------------------------------------------------------|---------------------------------------------------------------------------------------------------------------------------------------------------------------------------------------------------|
|                                        |                                                                                                                                                               |                                                                                                                                                                                                                                                                                        |                                                                                                                    | Concentration Data                                                                                                                                                                                                  | Presence Data                                                          | Market Share Data                                                      | Details                                                                                                                                                                                           |
| China<br><i>Liu et al.</i> , 2012 [20] | Female college students, 18–25 years ( <i>n</i> = 2044)<br>Cohort of female college students attending 10 different schools in the Guangdong province         | <input type="checkbox"/> Ace-K<br><input type="checkbox"/> Aspartame<br><input checked="" type="checkbox"/> Cyclamate<br><input checked="" type="checkbox"/> Saccharin<br><input type="checkbox"/> Steviol<br><input type="checkbox"/> Sucralose<br><input type="checkbox"/> Thaumatin | Quantitative FFQ                                                                                                   | <input checked="" type="checkbox"/> MPL<br><input type="checkbox"/> Reported Use Level<br><input checked="" type="checkbox"/> Analytical Data ( <i>n</i> = 252)                                                     | <input type="checkbox"/> Yes<br><input checked="" type="checkbox"/> No | <input type="checkbox"/> Yes<br><input checked="" type="checkbox"/> No | <input checked="" type="checkbox"/> Deterministic<br><input checked="" type="checkbox"/> Simple Distribution<br><input type="checkbox"/> Probabilistic                                            |
|                                        |                                                                                                                                                               |                                                                                                                                                                                                                                                                                        |                                                                                                                    | Analytical measurement in preserved fruits ( <i>n</i> = 252) and MPL                                                                                                                                                |                                                                        |                                                                        | 2 models:<br>(A) Point estimate: average population intake + average sweetener concentration<br>(B) Simple distribution: Individual consumption data + MPL                                        |
| China<br><i>Cao et al.</i> , 2016 [21] | All ages, ≥2 years; 2 to 3 years; 4–9 years; 10–17 years; 18–59 years; >60 years ( <i>n</i> = NR)<br>Participants of China Nutrition and Health Survey (2002) | <input type="checkbox"/> Ace-K<br><input type="checkbox"/> Aspartame<br><input checked="" type="checkbox"/> Cyclamate<br><input type="checkbox"/> Saccharin<br><input type="checkbox"/> Steviol<br><input type="checkbox"/> Sucralose<br><input type="checkbox"/> Thaumatin            | 3*24-hour recalls, FFQ (1-year) and/or weighed record included as part of China Nutrition and Health Survey (2002) | <input checked="" type="checkbox"/> MPL <sup>1</sup><br><input type="checkbox"/> Reported Use Level<br><input type="checkbox"/> Analytical Data<br>GB 2760-2014 - National Health and Family Planning Commission of | <input type="checkbox"/> Yes<br><input checked="" type="checkbox"/> No | <input type="checkbox"/> Yes<br><input checked="" type="checkbox"/> No | <input type="checkbox"/> Deterministic<br><input checked="" type="checkbox"/> Simple Distribution<br><input type="checkbox"/> Probabilistic<br><br>Individual consumption data + MPL <sup>1</sup> |

| Country Reference                           | Population Group Examined ( <i>n</i> )                                                                                                                                                    | Sweeteners Investigated                                                                                                                                                                                                                                                                                      | Food Consumption Data                            | Chemical Data                                                                                                                                                                              |                                                                        |                                                                        | Assessment Model(s)                                                                                                                                                                                                          |
|---------------------------------------------|-------------------------------------------------------------------------------------------------------------------------------------------------------------------------------------------|--------------------------------------------------------------------------------------------------------------------------------------------------------------------------------------------------------------------------------------------------------------------------------------------------------------|--------------------------------------------------|--------------------------------------------------------------------------------------------------------------------------------------------------------------------------------------------|------------------------------------------------------------------------|------------------------------------------------------------------------|------------------------------------------------------------------------------------------------------------------------------------------------------------------------------------------------------------------------------|
|                                             |                                                                                                                                                                                           |                                                                                                                                                                                                                                                                                                              |                                                  | Concentration Data                                                                                                                                                                         | Presence Data                                                          | Market Share Data                                                      | Details                                                                                                                                                                                                                      |
| India<br>Singhal and Mathur, 2008 [22]      | Cohort of assumed heavy consumers - diabetics ( <i>n</i> = 72), OW individuals ( <i>n</i> = 39), and female college students (from 3 colleges; <i>n</i> = 47) <sup>2</sup> ; Age range NR | <input checked="" type="checkbox"/> Ace-K<br><input checked="" type="checkbox"/> Aspartame<br><input type="checkbox"/> Cyclamate<br><input checked="" type="checkbox"/> Saccharin<br><input type="checkbox"/> Steviol<br><input checked="" type="checkbox"/> Sucralose<br><input type="checkbox"/> Thaumatin | Semi-quantitative FFQ                            | the PRC, 2014 [40]                                                                                                                                                                         | <input type="checkbox"/> Yes<br><input checked="" type="checkbox"/> No | <input type="checkbox"/> Yes<br><input checked="" type="checkbox"/> No | <input type="checkbox"/> Deterministic<br><input checked="" type="checkbox"/> Simple Distribution<br><input type="checkbox"/> Probabilistic<br><br>Individual consumption data + MPL/industry use level                      |
|                                             |                                                                                                                                                                                           |                                                                                                                                                                                                                                                                                                              |                                                  | <input checked="" type="checkbox"/> MPL (PFA, 2006) [41]<br><input checked="" type="checkbox"/> Reported Use Level (table-top sweeteners only)<br><input type="checkbox"/> Analytical Data |                                                                        |                                                                        |                                                                                                                                                                                                                              |
| Japan<br>Sadamasu <i>et al.</i> , 2009 [23] | Participants of Tokyo Metropolitan Health and Nutrition Survey (2004) (age range <sup>3</sup> and sample size NR)                                                                         | <input checked="" type="checkbox"/> Ace-K<br><input checked="" type="checkbox"/> Aspartame<br><input type="checkbox"/> Cyclamate<br><input checked="" type="checkbox"/> Saccharin<br><input type="checkbox"/> Steviol<br><input type="checkbox"/> Sucralose<br><input type="checkbox"/> Thaumatin            | Semi-weighed household dietary record (24 hours) | <input type="checkbox"/> MPL<br><input type="checkbox"/> Reported Use Level<br><input checked="" type="checkbox"/> Analytical Data                                                         | <input type="checkbox"/> Yes<br><input checked="" type="checkbox"/> No | <input type="checkbox"/> Yes<br><input checked="" type="checkbox"/> No | <input checked="" type="checkbox"/> Deterministic<br><input type="checkbox"/> Simple distribution<br><input type="checkbox"/> Probabilistic<br><br>Average population consumption data + analytical data                     |
|                                             |                                                                                                                                                                                           |                                                                                                                                                                                                                                                                                                              |                                                  |                                                                                                                                                                                            |                                                                        |                                                                        |                                                                                                                                                                                                                              |
| Japan<br>MHLW, 2010 [24]                    | Children, aged 1–6 years ( <i>n</i> = 2,123)<br>Participants of National Nurtition Survey (2001–2002) and National Health and                                                             | <input checked="" type="checkbox"/> Ace-K<br><input type="checkbox"/> Aspartame<br><input type="checkbox"/> Cyclamate<br><input checked="" type="checkbox"/> Saccharin<br><input type="checkbox"/> Steviol<br><input type="checkbox"/> Sucralose<br><input type="checkbox"/> Thaumatin                       | Semi-weighed household dietary record (24 hours) | <input type="checkbox"/> MPL<br><input type="checkbox"/> Reported Use Level<br><input checked="" type="checkbox"/> Analytical Data<br>Average measurement                                  | <input type="checkbox"/> Yes<br><input checked="" type="checkbox"/> No | <input type="checkbox"/> Yes<br><input checked="" type="checkbox"/> No | <input checked="" type="checkbox"/> Deterministic<br><input type="checkbox"/> Simple distribution<br><input type="checkbox"/> Probabilistic<br><br>Market basket survey: average consumption data + analytical concentration |
|                                             |                                                                                                                                                                                           |                                                                                                                                                                                                                                                                                                              |                                                  |                                                                                                                                                                                            |                                                                        |                                                                        |                                                                                                                                                                                                                              |

| Country Reference                             | Population Group Examined (n)                                                                                                           | Sweeteners Investigated                                                                                                                                                                                                                                                                                      | Food Consumption Data                            | Chemical Data                                                                                                                                                                                                                     |                                                                        | Assessment Model(s)                                                    |                                                                                                                                                                                                                                                                   |
|-----------------------------------------------|-----------------------------------------------------------------------------------------------------------------------------------------|--------------------------------------------------------------------------------------------------------------------------------------------------------------------------------------------------------------------------------------------------------------------------------------------------------------|--------------------------------------------------|-----------------------------------------------------------------------------------------------------------------------------------------------------------------------------------------------------------------------------------|------------------------------------------------------------------------|------------------------------------------------------------------------|-------------------------------------------------------------------------------------------------------------------------------------------------------------------------------------------------------------------------------------------------------------------|
|                                               |                                                                                                                                         |                                                                                                                                                                                                                                                                                                              |                                                  | Concentration Data                                                                                                                                                                                                                | Presence Data                                                          | Market Share Data                                                      | Details                                                                                                                                                                                                                                                           |
|                                               | Nutrition Survey (2003)                                                                                                                 |                                                                                                                                                                                                                                                                                                              |                                                  | Obtained from 6 government- or national-owned research institutes                                                                                                                                                                 |                                                                        |                                                                        |                                                                                                                                                                                                                                                                   |
| Japan<br>Kawaski <i>et al.</i> ,<br>2011 [25] | Adults, ≥20 years (n = 28,062)<br>Participants of National Nutrition Survey (2001–2002) and National Health and Nutrition Survey (2003) | <input checked="" type="checkbox"/> Ace-K<br><input checked="" type="checkbox"/> Aspartame<br><input type="checkbox"/> Cyclamate<br><input checked="" type="checkbox"/> Saccharin<br><input type="checkbox"/> Steviol<br><input checked="" type="checkbox"/> Sucralose<br><input type="checkbox"/> Thaumatin | Semi-weighed household dietary record (24 hours) | <input type="checkbox"/> MPL<br><input type="checkbox"/> Reported Use<br>Level<br><input checked="" type="checkbox"/> Analytical<br>Data<br>Average measurement obtained from 6 government- or national-owned research institutes | <input type="checkbox"/> Yes<br><input checked="" type="checkbox"/> No | <input type="checkbox"/> Yes<br><input checked="" type="checkbox"/> No | <input checked="" type="checkbox"/> Deterministic<br><input type="checkbox"/> Simple distribution<br><input type="checkbox"/> Probabilistic<br><br>Market basket survey: average consumption data + mean analytical concentration (with/without positive samples) |
| Japan<br>MHLW, 2011 [26]                      | Adults, ≥20 years (n = 21,890)<br>Participants of National Health and Nutrition Survey (2004–2006)                                      | <input checked="" type="checkbox"/> Ace-K<br><input type="checkbox"/> Aspartame<br><input type="checkbox"/> Cyclamate<br><input checked="" type="checkbox"/> Saccharin<br><input type="checkbox"/> Steviol<br><input type="checkbox"/> Sucralose<br><input type="checkbox"/> Thaumatin                       | Semi-weighed household dietary record (24 hours) | <input type="checkbox"/> MPL<br><input type="checkbox"/> Reported Use<br>Level<br><input checked="" type="checkbox"/> Analytical<br>Data<br>Average measurement obtained from 6                                                   | <input type="checkbox"/> Yes<br><input checked="" type="checkbox"/> No | <input type="checkbox"/> Yes<br><input checked="" type="checkbox"/> No | <input checked="" type="checkbox"/> Deterministic<br><input type="checkbox"/> Simple distribution<br><input type="checkbox"/> Probabilistic<br><br>Market basket survey: average consumption data + analytical concentration                                      |

| Country Reference                       | Population Group Examined (n)                                                                                                                                             | Sweeteners Investigated                                                                                                                                                                                                                                                                                                 | Food Consumption Data                        | Chemical Data                                                                                                                                                                                                                                                                        |                                                                        | Assessment Model(s)                                                    |                                                                                                                                                                                                                                                                     |
|-----------------------------------------|---------------------------------------------------------------------------------------------------------------------------------------------------------------------------|-------------------------------------------------------------------------------------------------------------------------------------------------------------------------------------------------------------------------------------------------------------------------------------------------------------------------|----------------------------------------------|--------------------------------------------------------------------------------------------------------------------------------------------------------------------------------------------------------------------------------------------------------------------------------------|------------------------------------------------------------------------|------------------------------------------------------------------------|---------------------------------------------------------------------------------------------------------------------------------------------------------------------------------------------------------------------------------------------------------------------|
|                                         |                                                                                                                                                                           |                                                                                                                                                                                                                                                                                                                         |                                              | Concentration Data                                                                                                                                                                                                                                                                   | Presence Data                                                          | Market Share Data                                                      | Details                                                                                                                                                                                                                                                             |
| Japan<br>MHLW, 2012 [27]                | Ages 1-6 years; 7-14 years; 15-19 years; ≥20 years; All ages ≥1 years (n = 4510)<br>Participants of Special Survey of the Frequency and Intake of Food Consumption (2010) | <input checked="" type="checkbox"/> Ace-K<br><input checked="" type="checkbox"/> Aspartame<br><input type="checkbox"/> Cyclamate<br><input checked="" type="checkbox"/> Saccharin<br><input checked="" type="checkbox"/> Steviol<br><input checked="" type="checkbox"/> Sucralose<br><input type="checkbox"/> Thaumatin | 3-day food diary (repeated 4 times per year) | government- or national-owned research institutes<br><br><input type="checkbox"/> MPL<br><input type="checkbox"/> Reported Use Level<br><input checked="" type="checkbox"/> Analytical data<br>Average measurement obtained from 6 government- or national-owned research institutes | <input type="checkbox"/> Yes<br><input checked="" type="checkbox"/> No | <input type="checkbox"/> Yes<br><input checked="" type="checkbox"/> No | <input checked="" type="checkbox"/> Deterministic<br><input type="checkbox"/> Simple distribution<br><input type="checkbox"/> Probabilistic<br><br>Market basket survey: average consumption data + mean analytical concentration                                   |
|                                         |                                                                                                                                                                           |                                                                                                                                                                                                                                                                                                                         |                                              | NA                                                                                                                                                                                                                                                                                   | <input type="checkbox"/> Yes<br><input checked="" type="checkbox"/> No | <input type="checkbox"/> Yes<br><input checked="" type="checkbox"/> No | <input checked="" type="checkbox"/> Deterministic<br><input type="checkbox"/> Simple distribution<br><input type="checkbox"/> Probabilistic<br><br>Disappearance data: estimated annual shipment volume (2010–2011) × 0.8 (loss during storage/transportation/use)/ |
| Japan<br>Sato <i>et al.</i> , 2013 [28] | Total population                                                                                                                                                          | <input checked="" type="checkbox"/> Ace-K<br><input checked="" type="checkbox"/> Aspartame<br><input type="checkbox"/> Cyclamate<br><input checked="" type="checkbox"/> Saccharin<br><input type="checkbox"/> Steviol<br><input checked="" type="checkbox"/> Sucralose<br><input type="checkbox"/> Thaumatin            | NA                                           | NA                                                                                                                                                                                                                                                                                   | <input type="checkbox"/> Yes<br><input checked="" type="checkbox"/> No | <input type="checkbox"/> Yes<br><input checked="" type="checkbox"/> No | <input checked="" type="checkbox"/> Deterministic<br><input type="checkbox"/> Simple distribution<br><input type="checkbox"/> Probabilistic<br><br>Disappearance data: estimated annual shipment volume (2010–2011) × 0.8 (loss during storage/transportation/use)/ |

| Country Reference                                               | Population Group Examined (n)                                                                                                                                                                      | Sweeteners Investigated                                                                                                                                                                                                                                                                                                 | Food Consumption Data                                 | Chemical Data                                                                                                                                                                                                                                       |                                                                        |                                                                        | Assessment Model(s)                                                                                                                                                                                                                                                                                        |
|-----------------------------------------------------------------|----------------------------------------------------------------------------------------------------------------------------------------------------------------------------------------------------|-------------------------------------------------------------------------------------------------------------------------------------------------------------------------------------------------------------------------------------------------------------------------------------------------------------------------|-------------------------------------------------------|-----------------------------------------------------------------------------------------------------------------------------------------------------------------------------------------------------------------------------------------------------|------------------------------------------------------------------------|------------------------------------------------------------------------|------------------------------------------------------------------------------------------------------------------------------------------------------------------------------------------------------------------------------------------------------------------------------------------------------------|
|                                                                 |                                                                                                                                                                                                    |                                                                                                                                                                                                                                                                                                                         |                                                       | Concentration Data                                                                                                                                                                                                                                  | Presence Data                                                          | Market Share Data                                                      | Details                                                                                                                                                                                                                                                                                                    |
| Japan<br>Kumai <i>et al.</i> , 2015<br>[29]; MHLW, 2015<br>[30] | Children 1-6 years<br>(n = 227)<br>Participants of<br>Special Survey of<br>the Frequency and<br>Intake of Food<br>Consumption<br>(2010)                                                            | <input checked="" type="checkbox"/> Ace-K<br><input type="checkbox"/> Aspartame<br><input type="checkbox"/> Cyclamate<br><input type="checkbox"/> Saccharin<br><input type="checkbox"/> Steviol<br><input checked="" type="checkbox"/> Sucralose<br><input type="checkbox"/> Thaumatin                                  | 3-day food<br>diary<br>(repeated 4<br>times per year) | <input type="checkbox"/> MPL<br><input type="checkbox"/> Reported Use<br>Level<br><input checked="" type="checkbox"/> Analytical<br>data<br>Average<br>measurement<br>obtained from 6<br>government- or<br>national-owned<br>research<br>institutes | <input type="checkbox"/> Yes<br><input checked="" type="checkbox"/> No | <input type="checkbox"/> Yes<br><input checked="" type="checkbox"/> No | 12,800,000 people (the Japanese<br>population in 2010)/365 days<br><input checked="" type="checkbox"/> Deterministic<br><input type="checkbox"/> Simple distribution<br><input type="checkbox"/> Probabilistic<br><br>Market basket survey: average<br>consumption data + mean<br>analytical concentration |
| Japan<br>MHLW, 2016 [31]                                        | Ages 1-6 years; 7-14<br>years; 15-19 years;<br>≥20 years; All ages<br>≥1 years (n = 4,510)<br>Participants of<br>Special Survey of<br>the Frequency and<br>Intake of Food<br>Consumption<br>(2010) | <input checked="" type="checkbox"/> Ace-K<br><input checked="" type="checkbox"/> Aspartame<br><input type="checkbox"/> Cyclamate<br><input checked="" type="checkbox"/> Saccharin<br><input checked="" type="checkbox"/> Steviol<br><input checked="" type="checkbox"/> Sucralose<br><input type="checkbox"/> Thaumatin | 3-day food<br>diary<br>(repeated 4<br>times per year) | <input type="checkbox"/> MPL<br><input type="checkbox"/> Reported Use<br>Level<br><input checked="" type="checkbox"/> Analytical<br>data<br>Average<br>measurement<br>obtained from 6<br>government- or<br>national-owned                           | <input type="checkbox"/> Yes<br><input checked="" type="checkbox"/> No | <input type="checkbox"/> Yes<br><input checked="" type="checkbox"/> No | <input checked="" type="checkbox"/> Deterministic<br><input type="checkbox"/> Simple distribution<br><input type="checkbox"/> Probabilistic<br><br>Market basket survey: average<br>consumption data + mean<br>analytical concentration                                                                    |

| Country Reference                          | Population Group Examined ( <i>n</i> )                                                                                                                                  | Sweeteners Investigated                                                                                                                                                                                                                                                                                      | Food Consumption Data | Chemical Data                                                                                                                                                                                                                                                 |                                                                        |                                                                        | Assessment Model(s)                                                                                                                                                                                           |
|--------------------------------------------|-------------------------------------------------------------------------------------------------------------------------------------------------------------------------|--------------------------------------------------------------------------------------------------------------------------------------------------------------------------------------------------------------------------------------------------------------------------------------------------------------|-----------------------|---------------------------------------------------------------------------------------------------------------------------------------------------------------------------------------------------------------------------------------------------------------|------------------------------------------------------------------------|------------------------------------------------------------------------|---------------------------------------------------------------------------------------------------------------------------------------------------------------------------------------------------------------|
|                                            |                                                                                                                                                                         |                                                                                                                                                                                                                                                                                                              |                       | Concentration Data                                                                                                                                                                                                                                            | Presence Data                                                          | Market Share Data                                                      | Details                                                                                                                                                                                                       |
| Korea<br>Choi <i>et al.</i> , 2011<br>[32] | All ages (age range and sample size NR)<br>Participants of KNHANES (2005)                                                                                               | <input checked="" type="checkbox"/> Ace-K<br><input checked="" type="checkbox"/> Aspartame<br><input type="checkbox"/> Cyclamate<br><input checked="" type="checkbox"/> Saccharin<br><input type="checkbox"/> Steviol<br><input checked="" type="checkbox"/> Sucralose<br><input type="checkbox"/> Thaumatin | 24-hour recall        | research institutes<br><br><input type="checkbox"/> MPL<br><input type="checkbox"/> Reported Use Level<br><input checked="" type="checkbox"/> Analytical data ( <i>n</i> = 584)<br><br>Collected from department stores, supermarkets, and convenience stores | <input type="checkbox"/> Yes<br><input checked="" type="checkbox"/> No | <input type="checkbox"/> Yes<br><input checked="" type="checkbox"/> No | <input checked="" type="checkbox"/> Deterministic<br><input type="checkbox"/> Simple Distribution<br><input type="checkbox"/> Probabilistic<br><br>Food consumption + mean sweetener concentration            |
| Korea<br>Lee <i>et al.</i> , 2011<br>[33]  | Children and adolescents ( <i>n</i> = 6625); 0–6 years; 7–12 years; 13–19 years<br>Participants of a national dietary survey, Dietary Intake Survey of Infant, Children | <input checked="" type="checkbox"/> Ace-K<br><input checked="" type="checkbox"/> Aspartame<br><input type="checkbox"/> Cyclamate<br><input checked="" type="checkbox"/> Saccharin<br><input type="checkbox"/> Steviol<br><input checked="" type="checkbox"/> Sucralose<br><input type="checkbox"/> Thaumatin | 2× 24-hour recall     | <input type="checkbox"/> MPL<br><input type="checkbox"/> Reported Use Level<br><input checked="" type="checkbox"/> Analytical data ( <i>n</i> = 92)<br><br>Snacks targeted at children                                                                        | <input type="checkbox"/> Yes<br><input checked="" type="checkbox"/> No | <input type="checkbox"/> Yes<br><input checked="" type="checkbox"/> No | <input type="checkbox"/> Deterministic<br><input checked="" type="checkbox"/> Simple Distribution<br><input type="checkbox"/> Probabilistic<br><br>Individual consumption data + mean sweetener concentration |

| Country Reference                         | Population Group Examined (n)                                                                                                   | Sweeteners Investigated                                                                                                                                                                                                                                                                              | Food Consumption Data | Chemical Data                                                                                                                                                                                                           |                                                                        |                                                                        | Assessment Model(s)                                                                                                                                                                                                                                                                                                                                     |
|-------------------------------------------|---------------------------------------------------------------------------------------------------------------------------------|------------------------------------------------------------------------------------------------------------------------------------------------------------------------------------------------------------------------------------------------------------------------------------------------------|-----------------------|-------------------------------------------------------------------------------------------------------------------------------------------------------------------------------------------------------------------------|------------------------------------------------------------------------|------------------------------------------------------------------------|---------------------------------------------------------------------------------------------------------------------------------------------------------------------------------------------------------------------------------------------------------------------------------------------------------------------------------------------------------|
|                                           |                                                                                                                                 |                                                                                                                                                                                                                                                                                                      |                       | Concentration Data                                                                                                                                                                                                      | Presence Data                                                          | Market Share Data                                                      | Details                                                                                                                                                                                                                                                                                                                                                 |
| Korea<br>Ha <i>et al.</i> , 2013a<br>[34] | and Adolescents<br>(2007–2009)<br><br>Total population                                                                          | <input checked="" type="checkbox"/> Ace-K<br><input type="checkbox"/> Aspartame<br><input type="checkbox"/> Cyclamate<br><input type="checkbox"/> Saccharin<br><input type="checkbox"/> Steviol                                                                                                      | Budget method         | <input checked="" type="checkbox"/> MPL <sup>4</sup><br><input type="checkbox"/> Reported Use Level<br><input type="checkbox"/> Analytical data                                                                         | <input type="checkbox"/> Yes<br><input checked="" type="checkbox"/> No | <input type="checkbox"/> Yes<br><input checked="" type="checkbox"/> No | <input checked="" type="checkbox"/> Deterministic<br><input type="checkbox"/> Simple Distribution<br><input type="checkbox"/> Probabilistic                                                                                                                                                                                                             |
|                                           | All ages, 1 to >65 years (n = 8081)<br>Participants of KNHANES who consumed intense sweeteners during the 24-hour recall (2009) | <input checked="" type="checkbox"/> Sucralose<br><input type="checkbox"/> Thaumatin                                                                                                                                                                                                                  | 24-hour recall        | <input type="checkbox"/> MPL<br><input type="checkbox"/> Reported Use Level<br><input checked="" type="checkbox"/> Analytical data<br>Analytical data (n = 605)<br><br>Collected from Korean grocery stores and markets | <input type="checkbox"/> Yes<br><input checked="" type="checkbox"/> No | <input type="checkbox"/> Yes<br><input checked="" type="checkbox"/> No | Budget method<br><input type="checkbox"/> Deterministic<br><input checked="" type="checkbox"/> Simple Distribution<br><input type="checkbox"/> Probabilistic<br><br>2 scenarios:<br>(A) Individual consumption data + mean sweetener concentration (all samples)<br>(B) Individual consumption data + mean sweetener concentration for positive samples |
| Korea<br>Ha <i>et al.</i> , 2013b<br>[35] | All ages, 1 to >65 years (n = 8,081)<br>Participants of KNHANES who consumed intense sweeteners during                          | <input type="checkbox"/> Ace-K<br><input checked="" type="checkbox"/> Aspartame<br><input type="checkbox"/> Cyclamate<br><input checked="" type="checkbox"/> Saccharin<br><input checked="" type="checkbox"/> Stevioside<br><input type="checkbox"/> Sucralose<br><input type="checkbox"/> Thaumatin | 24-hour recall        | <input type="checkbox"/> MPL<br><input type="checkbox"/> Reported Use Level<br><input checked="" type="checkbox"/> Analytical data (n = 541)                                                                            | <input type="checkbox"/> Yes<br><input checked="" type="checkbox"/> No | <input type="checkbox"/> Yes<br><input checked="" type="checkbox"/> No | <input type="checkbox"/> Deterministic<br><input checked="" type="checkbox"/> Simple Distribution<br><input type="checkbox"/> Probabilistic<br><br>2 scenarios:                                                                                                                                                                                         |

| Country Reference                      | Population Group Examined ( <i>n</i> )                                                                                                                                    | Sweeteners Investigated                                                                                                                                                                                                                                                                | Food Consumption Data | Chemical Data                                                                                                                                                                                                        |                                                                        |                                                                        | Assessment Model(s)                                                                                                                                                                                  |
|----------------------------------------|---------------------------------------------------------------------------------------------------------------------------------------------------------------------------|----------------------------------------------------------------------------------------------------------------------------------------------------------------------------------------------------------------------------------------------------------------------------------------|-----------------------|----------------------------------------------------------------------------------------------------------------------------------------------------------------------------------------------------------------------|------------------------------------------------------------------------|------------------------------------------------------------------------|------------------------------------------------------------------------------------------------------------------------------------------------------------------------------------------------------|
|                                        |                                                                                                                                                                           |                                                                                                                                                                                                                                                                                        |                       | Concentration Data                                                                                                                                                                                                   | Presence Data                                                          | Market Share Data                                                      | Details                                                                                                                                                                                              |
|                                        | the 24-hour recall (2009)                                                                                                                                                 |                                                                                                                                                                                                                                                                                        |                       | Collected from Korean grocery stores and markets based on permitted use of sweeteners and consumption in KNHANES 2009                                                                                                |                                                                        |                                                                        | (A) Individual consumption data + mean sweetener concentration (all samples)<br>(B) Individual consumption data + mean sweetener concentration for positive samples                                  |
| Korea<br>Suh and Choi, 2013 [36]       | All ages (sample size NR); 1–2 years; 3–6 years; 7–12 years; 13–19 years; 20–29 years; 30–39 years; 40–49 years; 50–64 years; >65 years<br>Participants of KNHANES (2010) | <input type="checkbox"/> Ace-K<br><input type="checkbox"/> Aspartame<br><input type="checkbox"/> Cyclamate<br><input checked="" type="checkbox"/> Saccharin<br><input type="checkbox"/> Steviol<br><input checked="" type="checkbox"/> Sucralose<br><input type="checkbox"/> Thaumatin | 24-hour recall        | <input type="checkbox"/> MPL<br><input type="checkbox"/> Reported Use Level<br><input checked="" type="checkbox"/> Analytical data (n=339 for saccharin and 590 for sucralose)<br><br>Domestic and imported products | <input type="checkbox"/> Yes<br><input checked="" type="checkbox"/> No | <input type="checkbox"/> Yes<br><input checked="" type="checkbox"/> No | <input checked="" type="checkbox"/> Deterministic<br><input type="checkbox"/> Simple Distribution<br><input type="checkbox"/> Probabilistic<br><br>Summary statistics + mean sweetener concentration |
| Korea<br>Kim <i>et al.</i> , 2014 [37] | Children and adolescents, aged 1-19 years ( <i>n</i> = 6082)                                                                                                              | <input checked="" type="checkbox"/> Ace-K<br><input checked="" type="checkbox"/> Aspartame<br><input type="checkbox"/> Cyclamate<br><input type="checkbox"/> Saccharin                                                                                                                 | 24-hour recall        | <input type="checkbox"/> MPL<br><input type="checkbox"/> Reported Use Level                                                                                                                                          | <input type="checkbox"/> Yes<br><input checked="" type="checkbox"/> No | <input type="checkbox"/> Yes<br><input checked="" type="checkbox"/> No | <input type="checkbox"/> Deterministic<br><input checked="" type="checkbox"/> Simple Distribution<br><input checked="" type="checkbox"/> Probabilistic                                               |

| Country Reference                      | Population Group Examined ( <i>n</i> )                                                                                                                                    | Sweeteners Investigated                                                                                                                                                                                                                                                                                           | Food Consumption Data | Chemical Data                                                                                                                                                                                                              |                                                                        |                                                                        | Assessment Model(s)                                                                                                                                                                                                               |
|----------------------------------------|---------------------------------------------------------------------------------------------------------------------------------------------------------------------------|-------------------------------------------------------------------------------------------------------------------------------------------------------------------------------------------------------------------------------------------------------------------------------------------------------------------|-----------------------|----------------------------------------------------------------------------------------------------------------------------------------------------------------------------------------------------------------------------|------------------------------------------------------------------------|------------------------------------------------------------------------|-----------------------------------------------------------------------------------------------------------------------------------------------------------------------------------------------------------------------------------|
|                                        |                                                                                                                                                                           |                                                                                                                                                                                                                                                                                                                   |                       | Concentration Data                                                                                                                                                                                                         | Presence Data                                                          | Market Share Data                                                      | Details                                                                                                                                                                                                                           |
|                                        | Participants of KNHANES (2007–2009)                                                                                                                                       | <input type="checkbox"/> Steviol<br><input checked="" type="checkbox"/> Sucralose<br><input type="checkbox"/> Thaumatococcus                                                                                                                                                                                      |                       | <input checked="" type="checkbox"/> Analytical data ( <i>n</i> = 738)<br><br>Non-alcoholic beverages only                                                                                                                  |                                                                        |                                                                        | 2 scenarios:<br>(A) Individual consumption data + mean sweetener concentration<br>(B) Individual consumption data + range of sweetener concentrations                                                                             |
| Korea<br>Suh <i>et al.</i> , 2014 [38] | All ages (sample size NR); 1–2 years; 3–6 years; 7–12 years; 13–19 years; 20–29 years; 30–39 years; 40–49 years; 50–64 years; >65 years<br>Participants of KNHANES (2010) | <input checked="" type="checkbox"/> Ace-K<br><input checked="" type="checkbox"/> Aspartame<br><input type="checkbox"/> Cyclamate<br><input type="checkbox"/> Saccharin<br><input type="checkbox"/> Steviol<br><input type="checkbox"/> Sucralose<br><input type="checkbox"/> Thaumatococcus                       | 24-hour recall        | <input type="checkbox"/> MPL<br><input type="checkbox"/> Reported Use Level<br><input checked="" type="checkbox"/> Analytical data ( <i>n</i> = 247 for aspartame and 305 for ace-K)<br><br>Domestic and imported products | <input type="checkbox"/> Yes<br><input checked="" type="checkbox"/> No | <input type="checkbox"/> Yes<br><input checked="" type="checkbox"/> No | <input checked="" type="checkbox"/> Deterministic<br><input type="checkbox"/> Simple Distribution<br><input type="checkbox"/> Probabilistic<br><br>Summary statistics + mean sweetener concentration                              |
| Korea<br>Lee <i>et al.</i> , 2017 [39] | All ages ( <i>n</i> = 34,706)<br>Participants of KNHANES (2010–2014)                                                                                                      | <input checked="" type="checkbox"/> Ace-K<br><input checked="" type="checkbox"/> Aspartame<br><input type="checkbox"/> Cyclamate<br><input checked="" type="checkbox"/> Saccharin<br><input type="checkbox"/> Steviol<br><input checked="" type="checkbox"/> Sucralose<br><input type="checkbox"/> Thaumatococcus | 24-hour recall        | <input type="checkbox"/> MPL<br><input type="checkbox"/> Reported Use Level<br><input checked="" type="checkbox"/> Analytical data ( <i>n</i> = >900)<br><br>Domestic and                                                  | <input type="checkbox"/> Yes<br><input checked="" type="checkbox"/> No | <input type="checkbox"/> Yes<br><input checked="" type="checkbox"/> No | <input type="checkbox"/> Deterministic<br><input checked="" type="checkbox"/> Simple Distribution<br><input type="checkbox"/> Probabilistic<br><br>Individual consumption data + Mean sweetener concentration of positive samples |

| Country Reference                          | Population Group Examined (n)                                                               | Sweeteners Investigated                                                                                                                                                                                                                                                                                      | Food Consumption Data | Chemical Data                                                                                                                                                      |                                                                        |                                                                        | Assessment Model(s)                                                                                                                                                                                                                        |
|--------------------------------------------|---------------------------------------------------------------------------------------------|--------------------------------------------------------------------------------------------------------------------------------------------------------------------------------------------------------------------------------------------------------------------------------------------------------------|-----------------------|--------------------------------------------------------------------------------------------------------------------------------------------------------------------|------------------------------------------------------------------------|------------------------------------------------------------------------|--------------------------------------------------------------------------------------------------------------------------------------------------------------------------------------------------------------------------------------------|
|                                            |                                                                                             |                                                                                                                                                                                                                                                                                                              |                       | Concentration Data                                                                                                                                                 | Presence Data                                                          | Market Share Data                                                      | Details                                                                                                                                                                                                                                    |
| Korea<br><br>Kim <i>et al.</i> , 2017 [42] | All ages; <2 years; 3–6 years; 7–12 years; 13–19 years; 20–64 years; >65 years (n = 20,788) | <input checked="" type="checkbox"/> Ace-K<br><input checked="" type="checkbox"/> Aspartame<br><input type="checkbox"/> Cyclamate<br><input checked="" type="checkbox"/> Saccharin<br><input type="checkbox"/> Steviol<br><input checked="" type="checkbox"/> Sucralose<br><input type="checkbox"/> Thaumatin | 24-hour recall        | imported products<br><input type="checkbox"/> MPL<br><input type="checkbox"/> Reported Use Level<br><input checked="" type="checkbox"/> Analytical data (n = >900) | <input type="checkbox"/> Yes<br><input checked="" type="checkbox"/> No | <input type="checkbox"/> Yes<br><input checked="" type="checkbox"/> No | <input type="checkbox"/> Deterministic<br><input checked="" type="checkbox"/> Simple Distribution<br><input type="checkbox"/> Probabilistic<br><br>Individual consumption data + mean sweetener concentration of positive samples          |
|                                            | Participants of KNHANES (2010–2013)<br><br>Total population                                 | <input type="checkbox"/> Ace-K<br><input type="checkbox"/> Aspartame<br><input type="checkbox"/> Cyclamate<br><input type="checkbox"/> Saccharin<br><input checked="" type="checkbox"/> Steviol<br><input type="checkbox"/> Sucralose<br><input checked="" type="checkbox"/> Thaumatin                       | NA                    | NA<br><br>Lee <i>et al.</i> , 2017 [39]                                                                                                                            | <input type="checkbox"/> Yes<br><input checked="" type="checkbox"/> No | <input type="checkbox"/> Yes<br><input checked="" type="checkbox"/> No | <input checked="" type="checkbox"/> Deterministic<br><input type="checkbox"/> Simple Distribution<br><input type="checkbox"/> Probabilistic<br><br>Poundage data: Total production, import, and export of food products and food additives |

Ace-K = acesulfame-K; FFQ = food frequency questionnaire; KNHANES = Korea National Health and Nutrition Examination Survey; MPL = maximum permitted level; n = sample size; NA = not Applicable; NR = not reported; OW = overweight; PRC = People's Republic of China. <sup>1</sup> Value reported as maximum residue limit (MRL) in the publication; however, the MPL is the standard terminology for food additives, and used herein. <sup>2</sup> Number of individuals (n) listed includes only 'regular consumers' of artificial sweeteners (defined as individuals consuming artificial sweeteners ≥1 time a week); intakes by 'occasional consumers' (defined as individuals consuming once a fortnight or less) were not examined. <sup>3</sup> Study does not specifically state the age group investigated; however intakes were expressed for a 50 kg individual, which aligns with the default value for adults utilized for other Japanese studies. <sup>4</sup> The second highest MPL was selected for solid foods as highest MPL was established for 'sugar'.

**Table S2.** Methodologies Utilized for Intake Assessments Conducted for Low-/No-Calorie Sweeteners in Australia/New Zealand.

| Country<br>Reference                                                | Population<br>Group<br>Examined ( <i>n</i> )                          | Sweeteners<br>Investigated                                                                                                                                    | Food<br>Consumption<br>Data | Chemical Data                                                                              |                                                                        |                                                                        | Assessment Model(s)                                                                                                                                                                                                                                                                                                                                                                                |
|---------------------------------------------------------------------|-----------------------------------------------------------------------|---------------------------------------------------------------------------------------------------------------------------------------------------------------|-----------------------------|--------------------------------------------------------------------------------------------|------------------------------------------------------------------------|------------------------------------------------------------------------|----------------------------------------------------------------------------------------------------------------------------------------------------------------------------------------------------------------------------------------------------------------------------------------------------------------------------------------------------------------------------------------------------|
|                                                                     |                                                                       |                                                                                                                                                               |                             | Concentration<br>Data <sup>1</sup>                                                         | Presence<br>Data                                                       | Market Share<br>Data                                                   | Details                                                                                                                                                                                                                                                                                                                                                                                            |
| Australia and<br>New Zealand<br><br>FSANZ, 2010,<br>2011a,b [43–45] | Australian<br>children, 2–16<br>years ( <i>n</i> = 4487)              | <input type="checkbox"/> Ace-K<br><input type="checkbox"/> Aspartame<br><input type="checkbox"/> Cyclamate                                                    | 24-hour recall              | <input checked="" type="checkbox"/> MPL +<br>proposed<br>amendments <sup>2</sup>           | <input type="checkbox"/> Yes<br><input checked="" type="checkbox"/> No | <input checked="" type="checkbox"/> Yes<br><input type="checkbox"/> No | <input type="checkbox"/> Deterministic<br><input checked="" type="checkbox"/> Simple Distribution<br><input type="checkbox"/> Probabilistic                                                                                                                                                                                                                                                        |
|                                                                     | Participants of<br>ANNPAS (2007)                                      | <input type="checkbox"/> Saccharin<br><input checked="" type="checkbox"/> Steviol<br><input type="checkbox"/> Sucralose<br><input type="checkbox"/> Thaumatin |                             | <input type="checkbox"/> Reported Use<br>Level<br><input type="checkbox"/> Analytical data |                                                                        | Assumed 30%<br>market uptake<br>(30% of the<br>MPL)                    | 3 scenarios:<br>(A) Individual consumption<br>data + MPL + 30% market share<br>for all food categories<br>(B) Individual consumption data<br>+ MPL + 30% market share for<br>all food categories except for<br>water based flavoured drinks<br>(C) Individual consumption<br>data + MPL + 30% market share<br>for all food categories except for<br>flavoured milk products<br>(including yoghurt) |
|                                                                     | General<br>Australian<br>population, ≥17<br>years ( <i>n</i> = NR)    |                                                                                                                                                               |                             |                                                                                            |                                                                        |                                                                        |                                                                                                                                                                                                                                                                                                                                                                                                    |
|                                                                     | Participants of<br>ANNS (1995)                                        |                                                                                                                                                               |                             |                                                                                            |                                                                        |                                                                        |                                                                                                                                                                                                                                                                                                                                                                                                    |
|                                                                     | New Zealand<br>children, 5–14<br>years ( <i>n</i> = 3275)             |                                                                                                                                                               |                             |                                                                                            |                                                                        |                                                                        |                                                                                                                                                                                                                                                                                                                                                                                                    |
|                                                                     | Participants of<br>NZNNS (2002)                                       |                                                                                                                                                               |                             |                                                                                            |                                                                        |                                                                        |                                                                                                                                                                                                                                                                                                                                                                                                    |
|                                                                     | General New<br>Zealand<br>population, ≥15<br>years ( <i>n</i> = 4636) |                                                                                                                                                               |                             |                                                                                            |                                                                        |                                                                        |                                                                                                                                                                                                                                                                                                                                                                                                    |

| Country<br>Reference                                            | Population<br>Group<br>Examined (n)                                                                                               | Sweeteners<br>Investigated                                                                                                                                                                                                                                                  | Food<br>Consumption<br>Data | Chemical Data                                                                                                                                                                  |                                                                        |                                                                        | Assessment Model(s)                                                                                                                                                          |
|-----------------------------------------------------------------|-----------------------------------------------------------------------------------------------------------------------------------|-----------------------------------------------------------------------------------------------------------------------------------------------------------------------------------------------------------------------------------------------------------------------------|-----------------------------|--------------------------------------------------------------------------------------------------------------------------------------------------------------------------------|------------------------------------------------------------------------|------------------------------------------------------------------------|------------------------------------------------------------------------------------------------------------------------------------------------------------------------------|
|                                                                 |                                                                                                                                   |                                                                                                                                                                                                                                                                             |                             | Concentration<br>Data <sup>1</sup>                                                                                                                                             | Presence<br>Data                                                       | Market Share<br>Data                                                   | Details                                                                                                                                                                      |
| Australia and<br>New Zealand<br><br>FSANZ, 2015a,b,c<br>[46–48] | Participants of<br>NZNNS (1997)                                                                                                   |                                                                                                                                                                                                                                                                             |                             |                                                                                                                                                                                |                                                                        |                                                                        |                                                                                                                                                                              |
|                                                                 | Australian<br>children, 2–6<br>years (n = 779)                                                                                    | <input checked="" type="checkbox"/> Ace-K<br><input type="checkbox"/> Aspartame<br><input type="checkbox"/> Cyclamate<br><input type="checkbox"/> Saccharin<br><input type="checkbox"/> Steviol<br><input type="checkbox"/> Sucralose<br><input type="checkbox"/> Thaumatin | 24-hour recall              | <input checked="" type="checkbox"/> MPL +<br>proposed<br>amendments <sup>3</sup><br><input type="checkbox"/> Reported Use<br>Level<br><input type="checkbox"/> Analytical data | <input type="checkbox"/> Yes<br><input checked="" type="checkbox"/> No | <input type="checkbox"/> Yes<br><input checked="" type="checkbox"/> No | <input type="checkbox"/> Deterministic<br><input checked="" type="checkbox"/> Simple Distribution<br><input type="checkbox"/> Probabilistic                                  |
|                                                                 | and 7–11 years<br>(n = 802);<br>general<br>Australian<br>population, ≥2<br>years (n =<br>12,153) and ≥12<br>years (n =<br>10,572) |                                                                                                                                                                                                                                                                             |                             |                                                                                                                                                                                |                                                                        |                                                                        | 2 scenarios:<br>(A) Individual consumption<br>data + MPL for chewing gum<br>only<br>(B) Combined estimated<br>dietary exposure from chewing<br>gum and 2004 sweetener survey |
|                                                                 | Participants of<br>ANNPAS<br>(2011–2012)                                                                                          |                                                                                                                                                                                                                                                                             |                             |                                                                                                                                                                                |                                                                        |                                                                        |                                                                                                                                                                              |
|                                                                 | New Zealand<br>children, 5–14<br>years (n = 3275)                                                                                 |                                                                                                                                                                                                                                                                             |                             |                                                                                                                                                                                |                                                                        |                                                                        |                                                                                                                                                                              |
|                                                                 | Participants of<br>NZNNS (2002)                                                                                                   |                                                                                                                                                                                                                                                                             |                             |                                                                                                                                                                                |                                                                        |                                                                        |                                                                                                                                                                              |

| Country<br>Reference | Population<br>Group<br>Examined ( <i>n</i> )                                                                      | Sweeteners<br>Investigated | Food<br>Consumption<br>Data | Chemical Data                      |                  |                      | Assessment Model(s) |
|----------------------|-------------------------------------------------------------------------------------------------------------------|----------------------------|-----------------------------|------------------------------------|------------------|----------------------|---------------------|
|                      |                                                                                                                   |                            |                             | Concentration<br>Data <sup>1</sup> | Presence<br>Data | Market Share<br>Data | Details             |
|                      | General New<br>Zealand<br>population, ≥15<br>years ( <i>n</i> = 4721)<br>Participants of<br>NZANS (2008–<br>2009) |                            |                             |                                    |                  |                      |                     |

Ace-k = acesulfame-k; ANNS = Australian National Nutrition Survey; ANNPAS = Australian National Nutrition and Physical Activity Survey; MPL = maximum permitted level; *n* = sample size; NZANS = New Zealand Adult Nutrition Survey; NZNNS = New Zealand National Children's Nutrition Survey. <sup>1</sup> Existing MPLs are specified in Schedule 15 of the Food Standards Code. <sup>2</sup> Amendments proposed by applicant: ice cream and edible ices 64 mg/kg; water based flavored drinks 160 mg/kg; formulated beverages 160 mg/kg, soy beverage, unflavored 65 mg/kg; soy beverage, flavored 175 mg/kg. <sup>3</sup> Amendments proposed by applicant: intensely sweetened chewing gum 5000 mg/kg.

**Table S3.** Methodologies Utilized for Intake Assessments Conducted for Low-/No-Calorie Sweeteners in Europe.

| Country Reference                             | Population Group Examined (n)                                                                                                            | Sweeteners Investigated                                                                                                                                                                                                                                                                                      | Food Consumption Data                                                                | Chemical Data                                                                                                                                                                                                       |                                                                        |                                                                        | Assessment Model(s)                                                                                                                                                                                                                                                                                                |
|-----------------------------------------------|------------------------------------------------------------------------------------------------------------------------------------------|--------------------------------------------------------------------------------------------------------------------------------------------------------------------------------------------------------------------------------------------------------------------------------------------------------------|--------------------------------------------------------------------------------------|---------------------------------------------------------------------------------------------------------------------------------------------------------------------------------------------------------------------|------------------------------------------------------------------------|------------------------------------------------------------------------|--------------------------------------------------------------------------------------------------------------------------------------------------------------------------------------------------------------------------------------------------------------------------------------------------------------------|
|                                               |                                                                                                                                          |                                                                                                                                                                                                                                                                                                              |                                                                                      | Concentration Data <sup>1</sup>                                                                                                                                                                                     | Presence Data                                                          | Market Share Data                                                      | Details                                                                                                                                                                                                                                                                                                            |
| Portugal<br>Lino <i>et al.</i> , 2008<br>[54] | Adolescents, 13–15 years (n = 65). Cohort of students attending a public high school in Coimbra (2006–2007) and total population         | <input checked="" type="checkbox"/> Ace-K<br><input checked="" type="checkbox"/> Aspartame<br><input type="checkbox"/> Cyclamate<br><input type="checkbox"/> Saccharin<br><input type="checkbox"/> Steviol<br><input type="checkbox"/> Sucralose<br><input type="checkbox"/> Thaumatin                       | Annual intake of soft drinks and nectars (2006) per Portuguese inhabitant            | <input type="checkbox"/> MPL<br><input type="checkbox"/> Reported Use Level<br><input checked="" type="checkbox"/> Analytical Data (n = 48, samples collected in school canteen and supermarkets in 2006–2007)      | <input type="checkbox"/> Yes<br><input checked="" type="checkbox"/> No | <input type="checkbox"/> Yes<br><input checked="" type="checkbox"/> No | <input checked="" type="checkbox"/> Deterministic<br><input type="checkbox"/> Simple Distribution<br><input type="checkbox"/> Probabilistic<br><br>Daily intake + Mean concentration / Default body weight                                                                                                         |
| Denmark<br>Leth <i>et al.</i> , 2008<br>[53]  | Total population 1–80 years (n = 3,098); young children 1–3 years (n = 278); children 4–6 years (n = 366); children 7–10 years (n = 376) | <input checked="" type="checkbox"/> Ace-K<br><input checked="" type="checkbox"/> Aspartame<br><input checked="" type="checkbox"/> Cyclamate<br><input checked="" type="checkbox"/> Saccharin<br><input type="checkbox"/> Steviol<br><input type="checkbox"/> Sucralose<br><input type="checkbox"/> Thaumatin | Information on consumption of non-alcoholic beverages collected via 7-day food diary | <input type="checkbox"/> MPL<br><input type="checkbox"/> Reported Use Level<br><input checked="" type="checkbox"/> Analytical Data (n = 177, collected by the Danish Veterinary and Food Administration, 2005-2006) | <input type="checkbox"/> Yes<br><input checked="" type="checkbox"/> No | <input type="checkbox"/> Yes<br><input checked="" type="checkbox"/> No | <input type="checkbox"/> Deterministic<br><input checked="" type="checkbox"/> Simple Distribution<br><input type="checkbox"/> Probabilistic<br><br>2 scenarios:<br>(A) Individual consumption data + mean concentration of positive samples<br>(B) Individual consumption data + mean concentration of all samples |

| Country Reference                            | Population Group Examined (n)                                                                                                                                                                                                                                                                                                                                                  | Sweeteners Investigated                                                                                                                                                                                                                                                                                      | Food Consumption Data                                                                                                                                                                        | Chemical Data                                                                                                                                                                                                                                                                                            |                                                                        |                                                                                                                                                                                                    | Assessment Model(s)                                                                                                                                                                                             |
|----------------------------------------------|--------------------------------------------------------------------------------------------------------------------------------------------------------------------------------------------------------------------------------------------------------------------------------------------------------------------------------------------------------------------------------|--------------------------------------------------------------------------------------------------------------------------------------------------------------------------------------------------------------------------------------------------------------------------------------------------------------|----------------------------------------------------------------------------------------------------------------------------------------------------------------------------------------------|----------------------------------------------------------------------------------------------------------------------------------------------------------------------------------------------------------------------------------------------------------------------------------------------------------|------------------------------------------------------------------------|----------------------------------------------------------------------------------------------------------------------------------------------------------------------------------------------------|-----------------------------------------------------------------------------------------------------------------------------------------------------------------------------------------------------------------|
|                                              |                                                                                                                                                                                                                                                                                                                                                                                |                                                                                                                                                                                                                                                                                                              |                                                                                                                                                                                              | Concentration Data <sup>1</sup>                                                                                                                                                                                                                                                                          | Presence Data                                                          | Market Share Data                                                                                                                                                                                  | Details                                                                                                                                                                                                         |
| Norway<br>Husøy <i>et al.</i> , 2008<br>[52] | Participants of Danish Dietary Survey (1995)<br>Participants from 4 national dietary surveys<br>Young children, aged 1 year and 2 years from Spedkost (n = 1204) and Småbarnskost (n = 1720), respectively;<br>Children, 4-, 9-, and 13 years (n = 2215) from Ungkost;<br>Adults, 16–79 years (n = 2672) from Norkost food survey (1997); and<br>Adults, aged 16–80 years (n = | <input checked="" type="checkbox"/> Ace-K<br><input checked="" type="checkbox"/> Aspartame<br><input checked="" type="checkbox"/> Cyclamate<br><input checked="" type="checkbox"/> Saccharin<br><input type="checkbox"/> Steviol<br><input type="checkbox"/> Sucralose<br><input type="checkbox"/> Thaumatin | Information on consumption of beverages and foods <sup>2</sup> from:<br>Semi-quantitative FFQ (1–2 year olds); 4-day food diary (4-, 9-, 13-year olds); FFQ (16–79 years); FFQ (16–80 years) | <input type="checkbox"/> MPL<br><input checked="" type="checkbox"/> Reported Use Level<br><input checked="" type="checkbox"/> Analytical Data<br><br>Industry use levels collected by the Norwegian food safety authority (2004)(beverages); Analytical data collected by Bergsten, 1998 (food products) | <input type="checkbox"/> Yes<br><input checked="" type="checkbox"/> No | <input checked="" type="checkbox"/> Yes<br><input type="checkbox"/> No<br><br>For beverages, chemical concentration weighted according to content and sales volumes provided by food manufacturers | <input type="checkbox"/> Deterministic<br><input checked="" type="checkbox"/> Simple Distribution<br><input type="checkbox"/> Probabilistic<br><br>Individual consumption data + average weighted concentration |

| Country Reference                             | Population Group Examined (n)                                                                                                                                                                | Sweeteners Investigated                                                                                                                                                                                                                                                                                      | Food Consumption Data                                                               | Chemical Data                                                                                                                                                                                                 |                                                                        |                                                                        | Assessment Model(s)                                                                                                                                                                                                                                                                                                            |
|-----------------------------------------------|----------------------------------------------------------------------------------------------------------------------------------------------------------------------------------------------|--------------------------------------------------------------------------------------------------------------------------------------------------------------------------------------------------------------------------------------------------------------------------------------------------------------|-------------------------------------------------------------------------------------|---------------------------------------------------------------------------------------------------------------------------------------------------------------------------------------------------------------|------------------------------------------------------------------------|------------------------------------------------------------------------|--------------------------------------------------------------------------------------------------------------------------------------------------------------------------------------------------------------------------------------------------------------------------------------------------------------------------------|
|                                               |                                                                                                                                                                                              |                                                                                                                                                                                                                                                                                                              |                                                                                     | Concentration Data <sup>1</sup>                                                                                                                                                                               | Presence Data                                                          | Market Share Data                                                      | Details                                                                                                                                                                                                                                                                                                                        |
| France<br>Bemrah <i>et al.</i> ,<br>2008 [51] | 1375) from<br>Omnibus survey<br>(1997)                                                                                                                                                       |                                                                                                                                                                                                                                                                                                              |                                                                                     |                                                                                                                                                                                                               |                                                                        |                                                                        |                                                                                                                                                                                                                                                                                                                                |
|                                               | Participants of<br>national dietary<br>survey (INCA1,<br>1998-1999)<br>All ages (n =<br>3033); children<br>and young<br>teenagers, 3–14<br>years (1018);<br>adults , ≥15<br>years (n = 1985) | <input type="checkbox"/> Ace-K<br><input type="checkbox"/> Aspartame<br><input checked="" type="checkbox"/> Cyclamate<br><input type="checkbox"/> Saccharin<br><input type="checkbox"/> Steviol<br><input type="checkbox"/> Sucralose<br><input type="checkbox"/> Thaumatin                                  | 7-day food diary                                                                    | <input type="checkbox"/> MPL<br><input checked="" type="checkbox"/> Reported Use<br>Level<br><input type="checkbox"/> Analytical Data<br><br>Industry use<br>levels collected by<br>the DGCCRF<br>(2002–2005) | <input type="checkbox"/> Yes<br><input checked="" type="checkbox"/> No | <input type="checkbox"/> Yes<br><input checked="" type="checkbox"/> No | <input type="checkbox"/> Deterministic<br><input checked="" type="checkbox"/> Simple Distribution<br><input type="checkbox"/> Probabilistic<br><br>2 scenarios:<br>(1) Individual consumption data<br>+ Mean concentration of all<br>samples<br>(2) Individual consumption data<br>+ Mean concentration of positive<br>samples |
| Austria<br>Mischek, 2010<br>[56]              | National<br>consumption<br>data available<br>from Australian<br>Nutrition<br>Report 2003 <sup>3</sup> for<br>Preschool<br>children (3–6<br>years) and<br>adults (19–65) (n                   | <input checked="" type="checkbox"/> Ace-K<br><input checked="" type="checkbox"/> Aspartame<br><input checked="" type="checkbox"/> Cyclamate<br><input checked="" type="checkbox"/> Saccharin<br><input type="checkbox"/> Steviol<br><input type="checkbox"/> Sucralose<br><input type="checkbox"/> Thaumatin | 3-day weighted<br>record<br>(preschool<br>children), 24-<br>hour recall<br>(adults) | <input type="checkbox"/> MPL<br><input type="checkbox"/> Reported Use<br>Level<br><input checked="" type="checkbox"/> Analytical Data<br>(n = 159,<br>beverage samples<br>collected between<br>2006–2008)     | <input type="checkbox"/> Yes<br><input checked="" type="checkbox"/> No | <input type="checkbox"/> Yes<br><input checked="" type="checkbox"/> No | <input checked="" type="checkbox"/> Deterministic<br><input type="checkbox"/> Simple Distribution<br><input type="checkbox"/> Probabilistic<br><br>Consumption data for<br>population group + average<br>concentration data/default body<br>weight                                                                             |

| Country Reference                                   | Population Group Examined (n)                                          | Sweeteners Investigated                                                                                                                                                                                                                                                                                      | Food Consumption Data                                                                                                        | Chemical Data                                                                                                                                                                                            |                                                                        |                                                                        | Assessment Model(s)                                                                                                                                                                                                                   |
|-----------------------------------------------------|------------------------------------------------------------------------|--------------------------------------------------------------------------------------------------------------------------------------------------------------------------------------------------------------------------------------------------------------------------------------------------------------|------------------------------------------------------------------------------------------------------------------------------|----------------------------------------------------------------------------------------------------------------------------------------------------------------------------------------------------------|------------------------------------------------------------------------|------------------------------------------------------------------------|---------------------------------------------------------------------------------------------------------------------------------------------------------------------------------------------------------------------------------------|
|                                                     |                                                                        |                                                                                                                                                                                                                                                                                                              |                                                                                                                              | Concentration Data <sup>1</sup>                                                                                                                                                                          | Presence Data                                                          | Market Share Data                                                      | Details                                                                                                                                                                                                                               |
| Portugal<br>Lino and Pena, 2010 [51]                | = 151 and 2581, respectively)<br>Total population                      | <input type="checkbox"/> Ace-K<br><input type="checkbox"/> Aspartame<br><input type="checkbox"/> Cyclamate<br><input checked="" type="checkbox"/> Saccharin<br><input type="checkbox"/> Steviol<br><input type="checkbox"/> Sucralose<br><input type="checkbox"/> Thaumatin                                  | Annual intake of traditional soft drinks and soft drinks based on mineral water and nectars per Portuguese inhabitant (2006) | <input type="checkbox"/> MPL<br><input type="checkbox"/> Reported Use Level<br><input checked="" type="checkbox"/> Analytical Data (n = 48)<br><br>Purchased in the central zone of Portugal (2006–2007) | <input type="checkbox"/> Yes<br><input checked="" type="checkbox"/> No | <input type="checkbox"/> Yes<br><input checked="" type="checkbox"/> No | <input checked="" type="checkbox"/> Deterministic<br><input type="checkbox"/> Simple Distribution<br><input type="checkbox"/> Probabilistic<br><br>Daily intake + Mean concentration / Default body weight                            |
| Netherlands<br>Hendriksen <i>et al.</i> , 2011 [57] | Young adults, 19–30 years (n = 750)<br>Participants of DNFCs 2007–2010 | <input checked="" type="checkbox"/> Ace-K<br><input checked="" type="checkbox"/> Aspartame<br><input checked="" type="checkbox"/> Cyclamate<br><input checked="" type="checkbox"/> Saccharin<br><input type="checkbox"/> Steviol<br><input type="checkbox"/> Sucralose<br><input type="checkbox"/> Thaumatin | Data on carbonated soft drinks from 24-h dietary recalls                                                                     | <input type="checkbox"/> MPL<br><input type="checkbox"/> Reported Use Level<br><input checked="" type="checkbox"/> Analytical Data<br><br>Collected by the Dutch Food Safety Authority (2006 and 2008)   | <input type="checkbox"/> Yes<br><input checked="" type="checkbox"/> No | <input type="checkbox"/> Yes<br><input checked="" type="checkbox"/> No | <input type="checkbox"/> Deterministic<br><input checked="" type="checkbox"/> Simple Distribution<br><input type="checkbox"/> Probabilistic<br><br>Individual consumption data + Actual concentrations (or average, if not available) |
| Belgium<br>Huvaere <i>et al.</i> , 2012 [58]        | Adults, aged ≥15 years (n = 3,083), including                          | <input checked="" type="checkbox"/> Ace-K<br><input checked="" type="checkbox"/> Aspartame<br><input checked="" type="checkbox"/> Cyclamate<br><input checked="" type="checkbox"/> Saccharin                                                                                                                 | 2× 24-hour recall                                                                                                            | <input checked="" type="checkbox"/> MPL<br><input type="checkbox"/> Reported Use Level                                                                                                                   | <input type="checkbox"/> Yes<br><input checked="" type="checkbox"/> No | <input type="checkbox"/> Yes<br><input checked="" type="checkbox"/> No | <input type="checkbox"/> Deterministic<br><input checked="" type="checkbox"/> Simple Distribution<br><input type="checkbox"/> Probabilistic                                                                                           |

| Country Reference                                              | Population Group Examined (n)                                                                 | Sweeteners Investigated                                                                                                                                                                                                                                                                           | Food Consumption Data                                                                                                        | Chemical Data                                                                                                                                                                                   |                                                                        |                                                                        | Assessment Model(s)                                                                                                                                                                                        |
|----------------------------------------------------------------|-----------------------------------------------------------------------------------------------|---------------------------------------------------------------------------------------------------------------------------------------------------------------------------------------------------------------------------------------------------------------------------------------------------|------------------------------------------------------------------------------------------------------------------------------|-------------------------------------------------------------------------------------------------------------------------------------------------------------------------------------------------|------------------------------------------------------------------------|------------------------------------------------------------------------|------------------------------------------------------------------------------------------------------------------------------------------------------------------------------------------------------------|
|                                                                |                                                                                               |                                                                                                                                                                                                                                                                                                   |                                                                                                                              | Concentration Data <sup>1</sup>                                                                                                                                                                 | Presence Data                                                          | Market Share Data                                                      | Details                                                                                                                                                                                                    |
|                                                                | diabetics (n = 428)<br>Participants of the Belgian Food Consumption Survey (dating from 2004) | <input type="checkbox"/> Steviol<br><input checked="" type="checkbox"/> Sucralose<br><input type="checkbox"/> Thaumatin                                                                                                                                                                           |                                                                                                                              | <input checked="" type="checkbox"/> Analytical Data (n = 119)<br><br>Sweetened products collected from major supermarkets in Belgium (2009–2010)                                                |                                                                        |                                                                        | 2 scenarios:<br>(A) Individual consumption data + MPL<br>(B) Individual consumption data + Mean concentration of positive samples                                                                          |
| Portugal<br>Diogo <i>et al.</i> , 2013<br>[59]                 | Total population                                                                              | <input checked="" type="checkbox"/> Ace-K<br><input checked="" type="checkbox"/> Aspartame<br><input type="checkbox"/> Cyclamate<br><input checked="" type="checkbox"/> Saccharin<br><input type="checkbox"/> Steviol<br><input type="checkbox"/> Sucralose<br><input type="checkbox"/> Thaumatin | Annual intake of traditional soft drinks and soft drinks based on mineral water and nectars per Portuguese inhabitant (2010) | <input type="checkbox"/> MPL<br><input type="checkbox"/> Reported Use Level<br><input checked="" type="checkbox"/> Analytical Data (n = 78)<br><br>Purchased in central zone of Portugal (2010) | <input type="checkbox"/> Yes<br><input checked="" type="checkbox"/> No | <input type="checkbox"/> Yes<br><input checked="" type="checkbox"/> No | <input checked="" type="checkbox"/> Deterministic<br><input type="checkbox"/> Simple Distribution<br><input type="checkbox"/> Probabilistic<br><br>Daily intake + Mean concentration / Default body weight |
| France, Italy, UK, Ireland<br>Vin <i>et al.</i> , 2013<br>[60] | France - Participants of the INCA 2 (2005-2007) aged 3-79 years (n = 4079)                    | <input checked="" type="checkbox"/> Ace-K<br><input checked="" type="checkbox"/> Aspartame<br><input type="checkbox"/> Cyclamate<br><input type="checkbox"/> Saccharin<br><input type="checkbox"/> Steviol<br><input type="checkbox"/> Sucralose                                                  | 7-day diary (French survey);<br>3-day diary (Italian survey);<br>4-day or 7-day diaries (UK                                  | <input checked="" type="checkbox"/> MPL<br><input checked="" type="checkbox"/> Reported Use Level (collected by Food Drink Europe)<br><input type="checkbox"/> Analytical Data                  | <input type="checkbox"/> Yes<br><input checked="" type="checkbox"/> No | <input type="checkbox"/> Yes<br><input checked="" type="checkbox"/> No | <input type="checkbox"/> Deterministic<br><input checked="" type="checkbox"/> Simple Distribution<br><input checked="" type="checkbox"/> Probabilistic<br><br>2 scenarios:                                 |

| Country Reference         | Population Group Examined (n)                                                                                                                                                                               | Sweeteners Investigated                                                                                               | Food Consumption Data                | Chemical Data                                                                                            |                                                                        |                                                                        | Assessment Model(s)                                                                                                                         |
|---------------------------|-------------------------------------------------------------------------------------------------------------------------------------------------------------------------------------------------------------|-----------------------------------------------------------------------------------------------------------------------|--------------------------------------|----------------------------------------------------------------------------------------------------------|------------------------------------------------------------------------|------------------------------------------------------------------------|---------------------------------------------------------------------------------------------------------------------------------------------|
|                           |                                                                                                                                                                                                             |                                                                                                                       |                                      | Concentration Data <sup>1</sup>                                                                          | Presence Data                                                          | Market Share Data                                                      | Details                                                                                                                                     |
| Norway<br>VKM, 2014a [71] | Italy -<br>Participants of the INRAN-SCAI (2005–2006), aged 1 mth to 97 years (n = 3323)                                                                                                                    | <input type="checkbox"/> Thaumatococcus                                                                               | survey); 7-day diary (Irish surveys) |                                                                                                          |                                                                        |                                                                        | (A) Individual consumption data + MPL<br>(B) Individual consumption data + range of sweetener concentrations                                |
|                           | UK -<br>Participants of the UK NDNS (1992–2001), aged 1.5 to >65 years (n = 6787)<br>Ireland,<br>Participants of the NSIFCS (1997–1999), NCFCS (2003–2004), or NTFS (2005–2006), aged 5–64 years (n = 2414) | <input type="checkbox"/> Thaumatococcus                                                                               |                                      |                                                                                                          |                                                                        |                                                                        |                                                                                                                                             |
| Norway<br>VKM, 2014a [71] | Children, 2 years (n = 1674)                                                                                                                                                                                | <input type="checkbox"/> Ace-K<br><input type="checkbox"/> Aspartame<br><input checked="" type="checkbox"/> Cyclamate | Semi-quantitative                    | <input checked="" type="checkbox"/> MPL<br><input checked="" type="checkbox"/> Reported Use Level (2012) | <input checked="" type="checkbox"/> Yes<br><input type="checkbox"/> No | <input checked="" type="checkbox"/> Yes<br><input type="checkbox"/> No | <input type="checkbox"/> Deterministic<br><input checked="" type="checkbox"/> Simple Distribution<br><input type="checkbox"/> Probabilistic |
|                           |                                                                                                                                                                                                             |                                                                                                                       |                                      |                                                                                                          |                                                                        |                                                                        |                                                                                                                                             |

| Country Reference         | Population Group Examined ( <i>n</i> )                                                                                                                                                                                                      | Sweeteners Investigated                                                                                                                                                  | Food Consumption Data  | Chemical Data                                                                                    |                                                                        |                                                                        | Assessment Model(s)                                                                                                                                                                                                                                                                                                                                                                                                                                                                                                                        |
|---------------------------|---------------------------------------------------------------------------------------------------------------------------------------------------------------------------------------------------------------------------------------------|--------------------------------------------------------------------------------------------------------------------------------------------------------------------------|------------------------|--------------------------------------------------------------------------------------------------|------------------------------------------------------------------------|------------------------------------------------------------------------|--------------------------------------------------------------------------------------------------------------------------------------------------------------------------------------------------------------------------------------------------------------------------------------------------------------------------------------------------------------------------------------------------------------------------------------------------------------------------------------------------------------------------------------------|
|                           |                                                                                                                                                                                                                                             |                                                                                                                                                                          |                        | Concentration Data <sup>1</sup>                                                                  | Presence Data                                                          | Market Share Data                                                      | Details                                                                                                                                                                                                                                                                                                                                                                                                                                                                                                                                    |
|                           | Participants of Småbarnskost (2006–2007)<br>Young women, 18–29 years ( <i>n</i> = 143); Young men, 18–29 years ( <i>n</i> = 138); 30–70 years ( <i>n</i> = 782); Men 30–70 years ( <i>n</i> = 724)<br>Participants of Norkost 3 (2010–2011) | <input checked="" type="checkbox"/> Saccharin<br><input checked="" type="checkbox"/> Steviol<br><input type="checkbox"/> Sucralose<br><input type="checkbox"/> Thaumatin | FFQ; 2× 24-hour recall | <input type="checkbox"/> Analytical Data<br><br>Soft drinks, "saft", nectar, and flavoured water | Collected from industry (2012)                                         | Annual sales volumes (L/year) (2012)                                   | 6 scenarios:<br>(A) Individual consumption data + mean concentration + occurrence data + market share data<br>(B) Individual consumption data + mean concentration + market share data<br>(C–cyclamate and saccharin) Individual consumption data + highest reported concentration + occurrence data<br>(D–cyclamate and saccharin) Individual consumption data + highest reported concentration<br>(E–steviol glycosides) Individual consumption data + MPL + occurrence data<br>(D–steviol glycosides) Individual consumption data + MPL |
| Norway<br>VKM, 2014b [72] | Children, 2 years ( <i>n</i> = 1674)                                                                                                                                                                                                        | <input checked="" type="checkbox"/> Ace-K<br><input checked="" type="checkbox"/> Aspartame<br><input type="checkbox"/> Cyclamate                                         | Semi-quantitative      | <input type="checkbox"/> MPL<br><input checked="" type="checkbox"/> Reported Use Level (2012)    | <input checked="" type="checkbox"/> Yes<br><input type="checkbox"/> No | <input checked="" type="checkbox"/> Yes<br><input type="checkbox"/> No | <input type="checkbox"/> Deterministic<br><input checked="" type="checkbox"/> Simple Distribution<br><input type="checkbox"/> Probabilistic                                                                                                                                                                                                                                                                                                                                                                                                |

| Country Reference                               | Population Group Examined (n)                                                                                                                                                                             | Sweeteners Investigated                                                                                                                                                                                                                                                     | Food Consumption Data  | Chemical Data                                                                                                                      |                                                                        |                                                                        | Assessment Model(s)                                                                                                                                                                                                                                                                                                                              |
|-------------------------------------------------|-----------------------------------------------------------------------------------------------------------------------------------------------------------------------------------------------------------|-----------------------------------------------------------------------------------------------------------------------------------------------------------------------------------------------------------------------------------------------------------------------------|------------------------|------------------------------------------------------------------------------------------------------------------------------------|------------------------------------------------------------------------|------------------------------------------------------------------------|--------------------------------------------------------------------------------------------------------------------------------------------------------------------------------------------------------------------------------------------------------------------------------------------------------------------------------------------------|
|                                                 |                                                                                                                                                                                                           |                                                                                                                                                                                                                                                                             |                        | Concentration Data <sup>1</sup>                                                                                                    | Presence Data                                                          | Market Share Data                                                      | Details                                                                                                                                                                                                                                                                                                                                          |
|                                                 | Participants of Småbarnskost (2007)<br>Young women, 18–29 years (n = 143); Young men, 18–29 years (n = 138); 30–70 years (n = 782);<br>Men 30–70 years (n = 724)<br>Participants of Norkost 3 (2010–2011) | <input type="checkbox"/> Saccharin<br><input type="checkbox"/> Steviols<br><input checked="" type="checkbox"/> Sucralose<br><input type="checkbox"/> Thaumatin                                                                                                              | FFQ; 2× 24-hour recall | <input type="checkbox"/> Analytical Data<br><br>Soft drinks, "soft", nectar, and flavoured water                                   | Collected from industry (2012)                                         | Annual sales volumes (L/year) in 2012                                  | 4 scenarios:<br>(A) Individual consumption data + mean concentration + occurrence data + market share data<br>(B) Individual consumption data + mean concentration + market share data<br>(C) Individual consumption data + highest reported concentration + occurrence data<br>(D) individual consumption data + highest reported concentration |
| France<br><br>Mancini <i>et al.</i> , 2015 [61] | Children, 1–4 months (n = 124); 5–6 months (127); 7–12 months (n = 195); 13–36 months (n = 259)<br>Participants of the BEBE-SFAE                                                                          | <input type="checkbox"/> Ace-K<br><input checked="" type="checkbox"/> Aspartame<br><input type="checkbox"/> Cyclamate<br><input type="checkbox"/> Saccharin<br><input type="checkbox"/> Steviol<br><input type="checkbox"/> Sucralose<br><input type="checkbox"/> Thaumatin | 3-day diary            | <input checked="" type="checkbox"/> MPL<br><input type="checkbox"/> Reported Use Level<br><input type="checkbox"/> Analytical Data | <input type="checkbox"/> Yes<br><input checked="" type="checkbox"/> No | <input type="checkbox"/> Yes<br><input checked="" type="checkbox"/> No | <input type="checkbox"/> Deterministic<br><input checked="" type="checkbox"/> Simple Distribution<br><input type="checkbox"/> Probabilistic<br><br>Individual consumption data + MPL                                                                                                                                                             |

| Country Reference                                | Population Group Examined (n)                                                                                                                                                                                | Sweeteners Investigated                                                                                                                                                                                                                                                                                                            | Food Consumption Data | Chemical Data                                                                                                                                                                                  |                                                                        |                                                                        | Assessment Model(s)                                                                                                                                                                                                                                                                                       |
|--------------------------------------------------|--------------------------------------------------------------------------------------------------------------------------------------------------------------------------------------------------------------|------------------------------------------------------------------------------------------------------------------------------------------------------------------------------------------------------------------------------------------------------------------------------------------------------------------------------------|-----------------------|------------------------------------------------------------------------------------------------------------------------------------------------------------------------------------------------|------------------------------------------------------------------------|------------------------------------------------------------------------|-----------------------------------------------------------------------------------------------------------------------------------------------------------------------------------------------------------------------------------------------------------------------------------------------------------|
|                                                  |                                                                                                                                                                                                              |                                                                                                                                                                                                                                                                                                                                    |                       | Concentration Data <sup>1</sup>                                                                                                                                                                | Presence Data                                                          | Market Share Data                                                      | Details                                                                                                                                                                                                                                                                                                   |
| Belgium<br>Van Loco <i>et al.</i> ,<br>2015 [62] | dietary survey<br>(2005)<br>Toddlers, children, adolescents, adults, the elderly (FAIM V1.1) (n = NR)                                                                                                        | <input checked="" type="checkbox"/> Ace-K<br><input checked="" type="checkbox"/> Aspartame<br><input checked="" type="checkbox"/> Cyclamate<br><input checked="" type="checkbox"/> Saccharin<br><input type="checkbox"/> Steviols<br><input checked="" type="checkbox"/> Sucralose<br><input type="checkbox"/> Thaumatin           | FAIM-V1.1 tool        | <input checked="" type="checkbox"/> MPL<br><input type="checkbox"/> Reported Use Level<br><input type="checkbox"/> Analytical Data                                                             | <input type="checkbox"/> Yes<br><input checked="" type="checkbox"/> No | <input type="checkbox"/> Yes<br><input checked="" type="checkbox"/> No | <input checked="" type="checkbox"/> Deterministic<br><input type="checkbox"/> Simple Distribution<br><input type="checkbox"/> Probabilistic<br><br>Summary statistics + MPL                                                                                                                               |
| Belgium<br>Dewinter <i>et al.</i> ,<br>2016 [63] | Children and adolescents with T1D (n = 103); 4–6 years (n = 9); 7–12 years (n = 35); 13–18 years (n = 59)<br>Cohort of T1D patients from the Pediatrics Department of the University Hospitals Leuven (2014) | <input checked="" type="checkbox"/> Ace-K<br><input checked="" type="checkbox"/> Aspartame<br><input checked="" type="checkbox"/> Cyclamate<br><input checked="" type="checkbox"/> Saccharin<br><input checked="" type="checkbox"/> Steviol<br><input checked="" type="checkbox"/> Sucralose<br><input type="checkbox"/> Thaumatin | FFQ                   | <input checked="" type="checkbox"/> MPL<br><input type="checkbox"/> Reported Use Level<br><input checked="" type="checkbox"/> Analytical Data (collected by Huvaere <i>et al.</i> , 2012) [58] | <input type="checkbox"/> Yes<br><input checked="" type="checkbox"/> No | <input type="checkbox"/> Yes<br><input checked="" type="checkbox"/> No | <input type="checkbox"/> Deterministic<br><input checked="" type="checkbox"/> Simple Distribution<br><input type="checkbox"/> Probabilistic<br><br>2 scenarios:<br>(A) Individual consumption data + MPL<br>(B) Individual consumption data + Mean concentration of positive samples or MPL (stevia only) |

| Country Reference                                   | Population Group Examined ( <i>n</i> )                                                                                     | Sweeteners Investigated                       | Food Consumption Data | Chemical Data                                                                        |                                                           |                                        | Assessment Model(s)                                                                    |
|-----------------------------------------------------|----------------------------------------------------------------------------------------------------------------------------|-----------------------------------------------|-----------------------|--------------------------------------------------------------------------------------|-----------------------------------------------------------|----------------------------------------|----------------------------------------------------------------------------------------|
|                                                     |                                                                                                                            |                                               |                       | Concentration Data <sup>1</sup>                                                      | Presence Data                                             | Market Share Data                      | Details                                                                                |
| Ireland<br><br>Martyn <i>et al.</i> , 2016 [64]     | Toddlers and Children ages 1–4 years ( <i>n</i> = 500)<br><br>Participants of the NPNS(2011–2012)                          | <input checked="" type="checkbox"/> Ace-K     | 4-day diary           | <input checked="" type="checkbox"/> MPL                                              | <input checked="" type="checkbox"/> Yes                   | <input type="checkbox"/> Yes           | <input type="checkbox"/> Deterministic                                                 |
|                                                     |                                                                                                                            | <input checked="" type="checkbox"/> Aspartame |                       | <input type="checkbox"/> Reported Use Level                                          | <input type="checkbox"/> No                               | <input checked="" type="checkbox"/> No | <input checked="" type="checkbox"/> Simple Distribution                                |
|                                                     |                                                                                                                            | <input type="checkbox"/> Cyclamate            |                       | <input checked="" type="checkbox"/> Analytical Data                                  |                                                           |                                        | <input checked="" type="checkbox"/> Probabilistic                                      |
|                                                     |                                                                                                                            | <input checked="" type="checkbox"/> Saccharin |                       |                                                                                      |                                                           |                                        |                                                                                        |
|                                                     |                                                                                                                            | <input type="checkbox"/> Steviol              |                       | FSAI chemical Sampling Program (2008-2011)                                           | Irish National Food Ingredient Database V4                |                                        | 4 scenarios:                                                                           |
|                                                     |                                                                                                                            | <input checked="" type="checkbox"/> Sucralose |                       |                                                                                      |                                                           |                                        | (A) Individual consumption data + MPL                                                  |
|                                                     |                                                                                                                            | <input type="checkbox"/> Thaumatococcus       |                       |                                                                                      |                                                           |                                        | (B) Individual consumption data + MPL + occurrence                                     |
|                                                     |                                                                                                                            |                                               |                       |                                                                                      |                                                           |                                        | (C) Individual consumption data + range of concentrations                              |
|                                                     |                                                                                                                            |                                               |                       |                                                                                      |                                                           |                                        | (D) Individual consumption data + range of concentrations + occurrence                 |
| Ireland<br><br>O’Sullivan <i>et al.</i> , 2016 [65] | Participants of the NPNS (2010–2011), aged 1–3 years ( <i>n</i> = 376), used as a surrogate for children with PKU and CMPA | <input checked="" type="checkbox"/> Ace-K     | 4-day diary           | <input checked="" type="checkbox"/> MPL                                              | <input checked="" type="checkbox"/> Yes                   | <input type="checkbox"/> Yes           | <input type="checkbox"/> Deterministic                                                 |
|                                                     |                                                                                                                            | <input checked="" type="checkbox"/> Aspartame |                       | <input checked="" type="checkbox"/> Reported Use Level (FSMPs, provided by Nutricia) | <input type="checkbox"/> No                               | <input checked="" type="checkbox"/> No | <input checked="" type="checkbox"/> Simple Distribution                                |
|                                                     |                                                                                                                            | <input type="checkbox"/> Cyclamate            |                       | <input type="checkbox"/> Analytical Data                                             |                                                           |                                        | <input checked="" type="checkbox"/> Probabilistic                                      |
|                                                     |                                                                                                                            | <input type="checkbox"/> Saccharin            |                       |                                                                                      |                                                           |                                        |                                                                                        |
|                                                     |                                                                                                                            | <input type="checkbox"/> Steviol              |                       |                                                                                      | Health Service Executive (HSE) list of Reimbursable Items |                                        | 5 scenarios <sup>4</sup> :                                                             |
|                                                     |                                                                                                                            | <input checked="" type="checkbox"/> Sucralose |                       |                                                                                      |                                                           |                                        | (1) Individual consumption data + MPL + 75% adherence                                  |
|                                                     |                                                                                                                            | <input type="checkbox"/> Thaumatococcus       |                       |                                                                                      |                                                           |                                        | (2a) Individual consumption data+ range of concentrations <sup>5</sup> + 75% adherence |

| Country Reference                            | Population Group Examined (n)                                                                | Sweeteners Investigated                                                                                                                                                                                                                                                                                                            | Food Consumption Data | Chemical Data                                                                                                                                                                                          |                                                                                                                                                |                                                                        | Assessment Model(s)                                                                                                                                                                                                                                                                                                                   |
|----------------------------------------------|----------------------------------------------------------------------------------------------|------------------------------------------------------------------------------------------------------------------------------------------------------------------------------------------------------------------------------------------------------------------------------------------------------------------------------------|-----------------------|--------------------------------------------------------------------------------------------------------------------------------------------------------------------------------------------------------|------------------------------------------------------------------------------------------------------------------------------------------------|------------------------------------------------------------------------|---------------------------------------------------------------------------------------------------------------------------------------------------------------------------------------------------------------------------------------------------------------------------------------------------------------------------------------|
|                                              |                                                                                              |                                                                                                                                                                                                                                                                                                                                    |                       | Concentration Data <sup>1</sup>                                                                                                                                                                        | Presence Data                                                                                                                                  | Market Share Data                                                      | Details                                                                                                                                                                                                                                                                                                                               |
|                                              |                                                                                              |                                                                                                                                                                                                                                                                                                                                    |                       |                                                                                                                                                                                                        |                                                                                                                                                |                                                                        | (2b) Individual consumption data+ range of concentrations <sup>5</sup> + 50% adherence (Scenario 2b)<br>(3a) Individual consumption data + range of use levels + occurrence + 75% adherence);<br>(3b) Individual consumption data + Range of use levels + Occurrence + 50% adherence                                                  |
| Ireland<br>Buffini <i>et al.</i> , 2017 [69] | Adults, 18–90 years (n = 1413)<br>Participants of the National Adult Nutrition Survey (2011) | <input checked="" type="checkbox"/> Ace-K<br><input checked="" type="checkbox"/> Aspartame<br><input checked="" type="checkbox"/> Cyclamate<br><input checked="" type="checkbox"/> Saccharin<br><input checked="" type="checkbox"/> Steviol<br><input checked="" type="checkbox"/> Sucralose<br><input type="checkbox"/> Thaumatin | 4-day diary           | <input checked="" type="checkbox"/> MPL<br><input type="checkbox"/> Reported Use Level<br><input checked="" type="checkbox"/> Analytical Data (n = 377)<br><br>Collected from major Irish supermarkets | <input checked="" type="checkbox"/> Yes<br><input type="checkbox"/> No<br><br>Irish National Food Ingredient Database V4 and food label survey | <input type="checkbox"/> Yes<br><input checked="" type="checkbox"/> No | <input type="checkbox"/> Deterministic<br><input checked="" type="checkbox"/> Simple Distribution<br><input type="checkbox"/> Probabilistic<br><br>3 scenarios:<br>(A) Individual consumption data + MPL<br>(B) Individual consumption data + MPL + occurrence<br>(C) Individual consumption data + Actual concentration + occurrence |
| Italy<br>Le Donne <i>et al.</i> , 2017 [66]  | All ages, ≥3 years (n = 3,270)<br>Participants of the INRAN-                                 | <input checked="" type="checkbox"/> Ace-K<br><input checked="" type="checkbox"/> Aspartame<br><input checked="" type="checkbox"/> Cyclamate<br><input checked="" type="checkbox"/> Saccharin                                                                                                                                       | 3-day diary           | <input checked="" type="checkbox"/> MPL<br><input type="checkbox"/> Reported Use Level<br><input checked="" type="checkbox"/> Analytical Data                                                          | <input checked="" type="checkbox"/> Yes<br><input type="checkbox"/> No                                                                         | <input type="checkbox"/> Yes<br><input checked="" type="checkbox"/> No | <input type="checkbox"/> Deterministic<br><input checked="" type="checkbox"/> Simple Distribution<br><input checked="" type="checkbox"/> Probabilistic                                                                                                                                                                                |

| Country Reference                               | Population Group Examined (n)                                                                                                                                  | Sweeteners Investigated                                                                                                                                                                                                                                                                | Food Consumption Data | Chemical Data                                                                                                                                                               |                                                                                                                                                                           |                                                                        | Assessment Model(s)                                                                                                                                                                                                                                                                                                                                      |
|-------------------------------------------------|----------------------------------------------------------------------------------------------------------------------------------------------------------------|----------------------------------------------------------------------------------------------------------------------------------------------------------------------------------------------------------------------------------------------------------------------------------------|-----------------------|-----------------------------------------------------------------------------------------------------------------------------------------------------------------------------|---------------------------------------------------------------------------------------------------------------------------------------------------------------------------|------------------------------------------------------------------------|----------------------------------------------------------------------------------------------------------------------------------------------------------------------------------------------------------------------------------------------------------------------------------------------------------------------------------------------------------|
|                                                 |                                                                                                                                                                |                                                                                                                                                                                                                                                                                        |                       | Concentration Data <sup>1</sup>                                                                                                                                             | Presence Data                                                                                                                                                             | Market Share Data                                                      | Details                                                                                                                                                                                                                                                                                                                                                  |
|                                                 | SCAI (2005–2006)                                                                                                                                               | <input checked="" type="checkbox"/> Steviol<br><input checked="" type="checkbox"/> Sucralose<br><input checked="" type="checkbox"/> Thaumatin                                                                                                                                          |                       | (n = 304 for stevia; n = 290 all other)<br><br>Steviol glycoside samples purchased in Rome; other sweeteners purchased in Italy and analyzed Janvier <i>et al.</i> , 2015   | Food label survey conducted in Rome (2014)                                                                                                                                |                                                                        | 3 scenarios:<br>(A) Individual consumption data + MPL<br>(B) Individual consumption data + MPL + occurrence<br>(C) Individual consumption data + Range of concentrations + occurrence                                                                                                                                                                    |
| Ireland<br>O’Sullivan <i>et al.</i> , 2017 [67] | Young healthy children, 1.5–3 years (n = 2096), used as a surrogate for children with PKU<br><br>Participants of the UK NDNS (1992–1993; 2008–2010; 2011–2012) | <input checked="" type="checkbox"/> Ace-K<br><input type="checkbox"/> Aspartame<br><input type="checkbox"/> Cyclamate<br><input type="checkbox"/> Saccharin<br><input type="checkbox"/> Steviol<br><input checked="" type="checkbox"/> Sucralose<br><input type="checkbox"/> Thaumatin | 4-day food diary      | <input checked="" type="checkbox"/> MPL<br><input checked="" type="checkbox"/> Reported Use Level (FSMPs, provided by Nutricia)<br><input type="checkbox"/> Analytical Data | <input checked="" type="checkbox"/> Yes<br><input type="checkbox"/> No<br><br>NHS Drug Tariff back issues, obtained from the British National Library Service (1992–2012) | <input type="checkbox"/> Yes<br><input checked="" type="checkbox"/> No | <input type="checkbox"/> Deterministic<br><input checked="" type="checkbox"/> Simple Distribution<br><input checked="" type="checkbox"/> Probabilistic<br><br>4 scenarios:<br>(A) MPL + 75% adherence<br>(B) MPL + 50% adherence<br>(C) Range of concentrations + occurrence + 75% adherence<br>(D) Range of concentrations + occurrence + 50% adherence |

| Country Reference                 | Population Group Examined (n)                                                                                                    | Sweeteners Investigated                                                                                                                                                                                                                                                     | Food Consumption Data                                                                                                                   | Concentration Data <sup>1</sup>                                                                                                                                                                                        | Chemical Data                                                          |                                                                        | Assessment Model(s)                                                                                                                                                                                |
|-----------------------------------|----------------------------------------------------------------------------------------------------------------------------------|-----------------------------------------------------------------------------------------------------------------------------------------------------------------------------------------------------------------------------------------------------------------------------|-----------------------------------------------------------------------------------------------------------------------------------------|------------------------------------------------------------------------------------------------------------------------------------------------------------------------------------------------------------------------|------------------------------------------------------------------------|------------------------------------------------------------------------|----------------------------------------------------------------------------------------------------------------------------------------------------------------------------------------------------|
|                                   |                                                                                                                                  |                                                                                                                                                                                                                                                                             |                                                                                                                                         |                                                                                                                                                                                                                        | Presence Data                                                          | Market Share Data                                                      | Details                                                                                                                                                                                            |
| EU Member States                  | Infants, toddlers, other children,                                                                                               | <input type="checkbox"/> Ace-K<br><input type="checkbox"/> Aspartame<br><input type="checkbox"/> Cyclamate                                                                                                                                                                  | Range of dietary intake methodologies included in the EFSA Comprehensive European Food Consumption Database, Level 3 summary statistics | <input checked="" type="checkbox"/> MPL<br><input type="checkbox"/> Reported Use Level<br><input type="checkbox"/> Analytical Data                                                                                     | <input checked="" type="checkbox"/> Yes<br><input type="checkbox"/> No | <input type="checkbox"/> Yes<br><input checked="" type="checkbox"/> No | <input checked="" type="checkbox"/> Deterministic<br><input type="checkbox"/> Simple Distribution<br><input type="checkbox"/> Probabilistic                                                        |
| Tennant and Bruyninckx, 2017 [68] | adolescents, adults, elderly, very elderly (n = NR)                                                                              | <input type="checkbox"/> Saccharin<br><input checked="" type="checkbox"/> Steviol<br><input type="checkbox"/> Sucralose<br><input type="checkbox"/> Thaumatin                                                                                                               |                                                                                                                                         |                                                                                                                                                                                                                        | Mintel Global New Products Database (2015)                             |                                                                        | 4 scenarios:<br>(A) Summary statistics + MPL<br>(B) Summary statistics + MPL + brand loyal<br>(C) Summary statistics + MPL + occurrence<br>(D) Summary statistics + MPL + Occurrence + brand loyal |
| EU Member States                  | Toddlers, 12–35 months;<br>Children, 3–9 years;<br>Adolescents, 10–17 years; Adults, 18–64 years;<br>Elderly, ≥65 years (n = NR) | <input type="checkbox"/> Ace-K<br><input checked="" type="checkbox"/> Aspartame<br><input type="checkbox"/> Cyclamate<br><input type="checkbox"/> Saccharin<br><input type="checkbox"/> Steviol<br><input type="checkbox"/> Sucralose<br><input type="checkbox"/> Thaumatin | Range of dietary intake methodologies included in the EFSA Comprehensive European Food Consumption Database (2010) [79]                 | <input checked="" type="checkbox"/> MPL<br><input checked="" type="checkbox"/> Reported Use Level<br><input checked="" type="checkbox"/> Analytical Data<br><br>Combination of industry use levels and analytical data | <input type="checkbox"/> Yes<br><input checked="" type="checkbox"/> No | <input type="checkbox"/> Yes<br><input checked="" type="checkbox"/> No | <input checked="" type="checkbox"/> Deterministic<br><input type="checkbox"/> Simple Distribution<br><input type="checkbox"/> Probabilistic                                                        |
| EFSA, 2013 [70]                   |                                                                                                                                  |                                                                                                                                                                                                                                                                             |                                                                                                                                         |                                                                                                                                                                                                                        |                                                                        |                                                                        | 2 scenarios:<br>(A) Summary statistics + MPL<br>(B) Summary statistics + actual concentration (reported/analytical)                                                                                |
| EU Member States                  | Toddlers, 12–35 months;<br>Children, 3–9                                                                                         | <input type="checkbox"/> Ace-K<br><input type="checkbox"/> Aspartame<br><input type="checkbox"/> Cyclamate                                                                                                                                                                  | Range of dietary intake methodologies                                                                                                   | <input checked="" type="checkbox"/> MPL + extension of use <sup>6</sup>                                                                                                                                                | <input type="checkbox"/> Yes<br><input checked="" type="checkbox"/> No | <input type="checkbox"/> Yes<br><input checked="" type="checkbox"/> No | <input checked="" type="checkbox"/> Deterministic<br><input type="checkbox"/> Simple Distribution<br><input type="checkbox"/> Probabilistic                                                        |

| Country Reference                       | Population Group Examined (n)                                                                      | Sweeteners Investigated                                                                                                                                                                                                                                                     | Food Consumption Data                                                             | Chemical Data                                                                           |                                                                        |                                                                        | Assessment Model(s)                                                                                                                         |
|-----------------------------------------|----------------------------------------------------------------------------------------------------|-----------------------------------------------------------------------------------------------------------------------------------------------------------------------------------------------------------------------------------------------------------------------------|-----------------------------------------------------------------------------------|-----------------------------------------------------------------------------------------|------------------------------------------------------------------------|------------------------------------------------------------------------|---------------------------------------------------------------------------------------------------------------------------------------------|
|                                         |                                                                                                    |                                                                                                                                                                                                                                                                             |                                                                                   | Concentration Data <sup>1</sup>                                                         | Presence Data                                                          | Market Share Data                                                      | Details                                                                                                                                     |
| EFSA, 2015a [73]                        | years;<br>Adolescents, 10–17 years; Adults, 18–64 years; Elderly, ≥65 years (n = NR)               | <input type="checkbox"/> Saccharin<br><input checked="" type="checkbox"/> Steviol<br><input type="checkbox"/> Sucralose<br><input type="checkbox"/> Thaumatin                                                                                                               | included in the EFSA Comprehensive European Food Consumption Database (2010) [79] | <input type="checkbox"/> Reported Use Level<br><input type="checkbox"/> Analytical Data |                                                                        |                                                                        | Summary statistics + MPL/extension of use                                                                                                   |
| EU Member States                        | Toddlers, 12–35 months;                                                                            | <input type="checkbox"/> Ace-K<br><input type="checkbox"/> Aspartame                                                                                                                                                                                                        | FAIM tool (summary intakes)                                                       | <input checked="" type="checkbox"/> MPL + extension of use <sup>7</sup>                 | <input type="checkbox"/> Yes<br><input checked="" type="checkbox"/> No | <input type="checkbox"/> Yes<br><input checked="" type="checkbox"/> No | <input checked="" type="checkbox"/> Deterministic<br><input type="checkbox"/> Simple Distribution<br><input type="checkbox"/> Probabilistic |
| EFSA, 2015b [74]                        | Children, 3–9 years;<br>Adolescents, 10–17 years; Adults, 18–64 years; Elderly, ≥65 years (n = NR) | <input type="checkbox"/> Cyclamate<br><input type="checkbox"/> Saccharin<br><input type="checkbox"/> Steviol<br><input type="checkbox"/> Sucralose<br><input checked="" type="checkbox"/> Thaumatin                                                                         |                                                                                   | <input type="checkbox"/> Reported Use Level<br><input type="checkbox"/> Analytical Data |                                                                        |                                                                        | Summary statistics + MPL/extension of use                                                                                                   |
| Assessment from FSMPs in Young Children | Young children, 1–3 years                                                                          | <input checked="" type="checkbox"/> Ace-K<br><input type="checkbox"/> Aspartame<br><input type="checkbox"/> Cyclamate<br><input type="checkbox"/> Saccharin<br><input type="checkbox"/> Steviol<br><input type="checkbox"/> Sucralose<br><input type="checkbox"/> Thaumatin | Fixed protein intake (absolute or bw)                                             | Fixed value of 4.1, 5.9, or 9 mg ace-k/g protein                                        | <input type="checkbox"/> Yes<br><input checked="" type="checkbox"/> No | <input type="checkbox"/> Yes<br><input checked="" type="checkbox"/> No | <input checked="" type="checkbox"/> Deterministic<br><input type="checkbox"/> Simple Distribution<br><input type="checkbox"/> Probabilistic |
| EFSA, 2016a [75]                        |                                                                                                    |                                                                                                                                                                                                                                                                             |                                                                                   |                                                                                         |                                                                        |                                                                        | 6 scenarios:<br>(A) 9 mg ace-k/g protein, providing 20 g protein/day<br>(B) 9 mg ace-k/g protein, providing 10 g protein/day                |

| Country Reference                                        | Population Group Examined (n) | Sweeteners Investigated                                                                                                                                                                                                                                                     | Food Consumption Data                 | Concentration Data <sup>1</sup>         | Chemical Data                                                          |                                                                        | Assessment Model(s)                                                                                                                                                                                                                                                                                                                                                                                                       |
|----------------------------------------------------------|-------------------------------|-----------------------------------------------------------------------------------------------------------------------------------------------------------------------------------------------------------------------------------------------------------------------------|---------------------------------------|-----------------------------------------|------------------------------------------------------------------------|------------------------------------------------------------------------|---------------------------------------------------------------------------------------------------------------------------------------------------------------------------------------------------------------------------------------------------------------------------------------------------------------------------------------------------------------------------------------------------------------------------|
|                                                          |                               |                                                                                                                                                                                                                                                                             |                                       |                                         | Presence Data                                                          | Market Share Data                                                      | Details                                                                                                                                                                                                                                                                                                                                                                                                                   |
| Assessment from FSMPs in Young Children EFSA, 2016b [76] | Young children, 1–3 years     | <input type="checkbox"/> Ace-K<br><input type="checkbox"/> Aspartame<br><input type="checkbox"/> Cyclamate<br><input type="checkbox"/> Saccharin<br><input type="checkbox"/> Steviol<br><input checked="" type="checkbox"/> Sucralose<br><input type="checkbox"/> Thaumatin | Fixed protein intake (absolute or bw) | Fixed value of 4 mg sucralose/g protein | <input type="checkbox"/> Yes<br><input checked="" type="checkbox"/> No | <input type="checkbox"/> Yes<br><input checked="" type="checkbox"/> No | (C) 5.9 mg ace-k/g protein, providing 3 g protein/kg bw/day<br>(D) 4.1 mg ace-k/g protein, providing 3 g protein/kg bw/day<br>(E) 5.9 mg ace-k/g protein, providing 20 g protein/ day<br>(F) 5.9 mg ace-k/g protein, providing 10 g proteinday                                                                                                                                                                            |
|                                                          |                               |                                                                                                                                                                                                                                                                             |                                       |                                         |                                                                        |                                                                        | <input checked="" type="checkbox"/> Deterministic<br><input type="checkbox"/> Simple Distribution<br><input type="checkbox"/> Probabilistic<br><br>3 scenarios, wherein there is 4 mg sucralose/g protein:<br>(A) Standard fixed protein intake of 14.5 g/day<br>(B) Maximum protein intake of 3 g/kg bw/day<br>(C) Protein intake ranging between 0.95 to 0.73 g /kg bw/day in children weighing between 10.2 to 14.7 kg |

Ace-K = acesulfame-K; bw = body weight; CMA = cow's milk protein allergy; DGCCRF = Directorate General for Fair Trading, Consumer Affairs and Fraud Control; DNFCS = Dutch National Food Consumption Survey; EFSA = European Food Safety Authority; EU = European Union; FAIM = Food Additive Intake Model; FFQ = food frequency questionnaire; FSAI = Food Safety Authority of Ireland; FSMP = foods for special medical purposes; HSE = Health Service Executive; INCA = Individual and National Study on Food Consumption; INRAN-SCAI = Italian National Food Consumption Survey; MPL = maximum permitted level; n = sample size; n/a = not applicable; NCFS = National Children's Food Survey; NDNS = National Diet and Nutrition Surveys; NHS = National Health Service; NPNS = National Pre-school Nutrition Survey; NR = not reported; NSIFCS = North/South Ireland Food Consumption Survey; NTFS = National Teens Food Survey; PKU = phenylketonuria; SFAE = French Association for Children's Food; T1D = type 1 diabetes; UK = United Kingdom. <sup>1</sup> MPL values for European studies obtained from Regulation 1333/2008 [77]. <sup>2</sup> Intake from food estimated for adults only. <sup>3</sup> Survey detail reported in Mischek [56] limited; survey details obtained from Elmadfa and Freisling (2004). <sup>4</sup> Assessment was also conducted using the FAIM template; however the authors noted that this database is not suitable for estimating exposures of young patients to artificial sweeteners from FSMPs because of the differences in dietary consumption patterns compared with healthy young children. <sup>5</sup> Data for scenarios 2a and 2b based on information from Table 2 in manuscript. <sup>6</sup> Extension of use of up to 29 mg/L steviol equivalents in tea, coffee, herbal infusion beverages, instant coffee and instant cappuccino products. <sup>7</sup> Extension of use of up to 5 mg/L thaumatin in flavored drinks. Extended condition of use as a flavor carrier. *Quantum satis* in all food flavorings.

**Table S4.** Methodologies Utilized for Intake Assessments Conducted for Low-/No-Calorie Sweeteners in Latin America.

| Country Reference                               | Population Group Examined (n)                                                                                                                         | Sweeteners Investigated                                                                                                                                                                                                                                                                                                            | Food Consumption Data                                                                                                           | Chemical Data                                                                                                                                                                   |                                                                                           |                                                                        | Assessment Model(s)                                                                                                                                                                                          |
|-------------------------------------------------|-------------------------------------------------------------------------------------------------------------------------------------------------------|------------------------------------------------------------------------------------------------------------------------------------------------------------------------------------------------------------------------------------------------------------------------------------------------------------------------------------|---------------------------------------------------------------------------------------------------------------------------------|---------------------------------------------------------------------------------------------------------------------------------------------------------------------------------|-------------------------------------------------------------------------------------------|------------------------------------------------------------------------|--------------------------------------------------------------------------------------------------------------------------------------------------------------------------------------------------------------|
|                                                 |                                                                                                                                                       |                                                                                                                                                                                                                                                                                                                                    |                                                                                                                                 | Concentration Data                                                                                                                                                              | Presence Data                                                                             | Market Share Data                                                      | Details                                                                                                                                                                                                      |
| Argentina<br>Cagnasso <i>et al.</i> , 2007 [81] | Cohort of children and adolescents attending public and private schools (middle and upper middle class) in Buenos Aires, 3–18 years ( <i>n</i> = 190) | <input checked="" type="checkbox"/> Ace-K<br><input checked="" type="checkbox"/> Aspartame<br><input checked="" type="checkbox"/> Cyclamate<br><input checked="" type="checkbox"/> Saccharin<br><input type="checkbox"/> Steviol<br><input type="checkbox"/> Sucralose<br><input type="checkbox"/> Thaumatin                       | FFQ of non-alcoholic beverages combined with portion size data (Technical Resolution MERCOSUR 47/03)                            | <input type="checkbox"/> MPL<br><input checked="" type="checkbox"/> Reported use level<br><input type="checkbox"/> Analytical data<br>Concentration declared on beverage labels | <input checked="" type="checkbox"/> Yes<br><input type="checkbox"/> No<br>Food label data | <input type="checkbox"/> Yes<br><input checked="" type="checkbox"/> No | <input type="checkbox"/> Deterministic<br><input checked="" type="checkbox"/> Simple Distribution<br><input type="checkbox"/> Probabilistic<br><br>Individual consumption data + use levels from food labels |
| Chile<br>Durán Agüero <i>et al.</i> , 2011 [82] | Cohort of children attending school in the Valparaíso region, 6–14 years ( <i>n</i> = 281)                                                            | <input checked="" type="checkbox"/> Ace-K<br><input checked="" type="checkbox"/> Aspartame<br><input checked="" type="checkbox"/> Cyclamate<br><input checked="" type="checkbox"/> Saccharin<br><input checked="" type="checkbox"/> Steviol<br><input checked="" type="checkbox"/> Sucralose<br><input type="checkbox"/> Thaumatin | FFQ of 122 food products containing artificial sweeteners collected from local supermarkets, , combined with household measures | <input type="checkbox"/> MPL<br><input checked="" type="checkbox"/> Reported use level<br><input type="checkbox"/> Analytical data<br>Concentration declared on food labels     | <input checked="" type="checkbox"/> Yes<br><input type="checkbox"/> No<br>Food label data | <input type="checkbox"/> Yes<br><input checked="" type="checkbox"/> No | <input type="checkbox"/> Deterministic<br><input checked="" type="checkbox"/> Simple Distribution<br><input type="checkbox"/> Probabilistic<br><br>Individual consumption data + use levels from food labels |

| Country Reference                               | Population Group Examined (n)                                                                                                                                                                                                                            | Sweeteners Investigated                                                                                                                                                                                                                                                                                                            | Food Consumption Data                                                                                                               | Chemical Data                                                                                                                                                                   |                                                                                               |                                                                        | Assessment Model(s)                                                                                                                                                                                          |
|-------------------------------------------------|----------------------------------------------------------------------------------------------------------------------------------------------------------------------------------------------------------------------------------------------------------|------------------------------------------------------------------------------------------------------------------------------------------------------------------------------------------------------------------------------------------------------------------------------------------------------------------------------------|-------------------------------------------------------------------------------------------------------------------------------------|---------------------------------------------------------------------------------------------------------------------------------------------------------------------------------|-----------------------------------------------------------------------------------------------|------------------------------------------------------------------------|--------------------------------------------------------------------------------------------------------------------------------------------------------------------------------------------------------------|
|                                                 |                                                                                                                                                                                                                                                          |                                                                                                                                                                                                                                                                                                                                    |                                                                                                                                     | Concentration Data                                                                                                                                                              | Presence Data                                                                                 | Market Share Data                                                      | Details                                                                                                                                                                                                      |
| Chile<br>Hamilton <i>et al.</i> ,<br>2013 [85]  | Cohort from the Metropolitan region involving Adults, 18–79 years ( <i>n</i> = 477); children, 6–17 years ( <i>n</i> = 516); adults with diabetes (Type1/2), 18–79 years ( <i>n</i> = 155); children with diabetes (Type 1), 3–17 years ( <i>n</i> = 63) | <input checked="" type="checkbox"/> Ace-K<br><input checked="" type="checkbox"/> Aspartame<br><input checked="" type="checkbox"/> Cyclamate<br><input checked="" type="checkbox"/> Saccharin<br><input checked="" type="checkbox"/> Steviol<br><input checked="" type="checkbox"/> Sucralose<br><input type="checkbox"/> Thaumatin | FFQ of 207 food products containing artificial sweeteners, combined with food atlas of portion sizes collected from Chilean markets | <input type="checkbox"/> MPL<br><input checked="" type="checkbox"/> Reported use level<br><input type="checkbox"/> Analytical data<br><br>Concentration declared on food labels | <input checked="" type="checkbox"/> Yes<br><input type="checkbox"/> No<br><br>Food label data | <input type="checkbox"/> Yes<br><input checked="" type="checkbox"/> No | <input type="checkbox"/> Deterministic<br><input checked="" type="checkbox"/> Simple Distribution<br><input type="checkbox"/> Probabilistic<br><br>Individual consumption data + use levels from food labels |
| Chile<br>Durán Agüero <i>et al.</i> , 2014 [83] | Cohort of school children from Viña del Mar and Santiago, 10–16 years ( <i>n</i> = 571)                                                                                                                                                                  | <input checked="" type="checkbox"/> Ace-K<br><input checked="" type="checkbox"/> Aspartame<br><input checked="" type="checkbox"/> Cyclamate<br><input checked="" type="checkbox"/> Saccharin<br><input type="checkbox"/> Steviol<br><input checked="" type="checkbox"/> Sucralose<br><input type="checkbox"/> Thaumatin            | FFQ (1 week) of 144 food products containing artificial sweeteners, combined with household measures                                | <input type="checkbox"/> MPL<br><input checked="" type="checkbox"/> Reported use level<br><input type="checkbox"/> Analytical data<br><br>Concentration declared on food labels | <input checked="" type="checkbox"/> Yes<br><input type="checkbox"/> No<br><br>Food label data | <input type="checkbox"/> Yes<br><input checked="" type="checkbox"/> No | <input type="checkbox"/> Deterministic<br><input checked="" type="checkbox"/> Simple Distribution<br><input type="checkbox"/> Probabilistic<br><br>Individual consumption data + use levels from food labels |

| Country Reference                       | Population Group Examined (n)                            | Sweeteners Investigated                                                                                                                                                                                                                                                                           | Food Consumption Data                                                                                                                                                                   | Chemical Data                                                                                                                                                                   |                                                                                               |                                                                        | Assessment Model(s)                                                                                                                                                                                          |
|-----------------------------------------|----------------------------------------------------------|---------------------------------------------------------------------------------------------------------------------------------------------------------------------------------------------------------------------------------------------------------------------------------------------------|-----------------------------------------------------------------------------------------------------------------------------------------------------------------------------------------|---------------------------------------------------------------------------------------------------------------------------------------------------------------------------------|-----------------------------------------------------------------------------------------------|------------------------------------------------------------------------|--------------------------------------------------------------------------------------------------------------------------------------------------------------------------------------------------------------|
|                                         |                                                          |                                                                                                                                                                                                                                                                                                   |                                                                                                                                                                                         | Concentration Data                                                                                                                                                              | Presence Data                                                                                 | Market Share Data                                                      | Details                                                                                                                                                                                                      |
| Chile, Panama, Guatemala, and Peru      | Cohort of adults attending university from each country, | <input checked="" type="checkbox"/> Ace-K<br><input checked="" type="checkbox"/> Aspartame<br><input type="checkbox"/> Cyclamate<br><input type="checkbox"/> Saccharin<br><input type="checkbox"/> Steviol<br><input checked="" type="checkbox"/> Sucralose<br><input type="checkbox"/> Thaumatin | FFQ (1 week) of 122, 109, 29, and 124 food products containing artificial sweeteners, combined with household measures, collected from Chile, Panama, Guatemala, and Peru, respectively | <input type="checkbox"/> MPL<br><input checked="" type="checkbox"/> Reported use level<br><input type="checkbox"/> Analytical data<br><br>Concentration declared on food labels | <input checked="" type="checkbox"/> Yes<br><input type="checkbox"/> No<br><br>Food label data | <input type="checkbox"/> Yes<br><input checked="" type="checkbox"/> No | <input type="checkbox"/> Deterministic<br><input checked="" type="checkbox"/> Simple Distribution<br><input type="checkbox"/> Probabilistic<br><br>Individual consumption data + use levels from food labels |
| Durán Agüero <i>et al.</i> , 2015a [86] | 18-26 years ( <i>n</i> = 1224)                           |                                                                                                                                                                                                                                                                                                   |                                                                                                                                                                                         |                                                                                                                                                                                 |                                                                                               |                                                                        |                                                                                                                                                                                                              |
| Chile, Panama, Guatemala, and Peru      | Cohort of adults attending university from each country, | <input checked="" type="checkbox"/> Ace-K<br><input checked="" type="checkbox"/> Aspartame<br><input type="checkbox"/> Cyclamate<br><input type="checkbox"/> Saccharin<br><input type="checkbox"/> Steviol<br><input checked="" type="checkbox"/> Sucralose<br><input type="checkbox"/> Thaumatin | FFQ (1 week) for carbonated beverage products containing artificial sweeteners, combined with food atlas of portion sizes                                                               | <input type="checkbox"/> MPL<br><input checked="" type="checkbox"/> Reported use level<br><input type="checkbox"/> Analytical data<br><br>Concentration declared on food labels | <input checked="" type="checkbox"/> Yes<br><input type="checkbox"/> No<br><br>Food label data | <input type="checkbox"/> Yes<br><input checked="" type="checkbox"/> No | <input type="checkbox"/> Deterministic<br><input checked="" type="checkbox"/> Simple Distribution<br><input type="checkbox"/> Probabilistic<br><br>Individual consumption data + use levels from food labels |
| Durán Agüero <i>et al.</i> , 2015b [87] | aged 18–26 years ( <i>n</i> = 1229)                      |                                                                                                                                                                                                                                                                                                   |                                                                                                                                                                                         |                                                                                                                                                                                 |                                                                                               |                                                                        |                                                                                                                                                                                                              |

| Country Reference                                | Population Group Examined (n)                                                                                        | Sweeteners Investigated                                                                                                                                                                                                                                                     | Food Consumption Data                                        | Chemical Data                                                                                                                                                               |                                                                                           |                                                                        | Assessment Model(s)                                                                                                                                                                                      |
|--------------------------------------------------|----------------------------------------------------------------------------------------------------------------------|-----------------------------------------------------------------------------------------------------------------------------------------------------------------------------------------------------------------------------------------------------------------------------|--------------------------------------------------------------|-----------------------------------------------------------------------------------------------------------------------------------------------------------------------------|-------------------------------------------------------------------------------------------|------------------------------------------------------------------------|----------------------------------------------------------------------------------------------------------------------------------------------------------------------------------------------------------|
|                                                  |                                                                                                                      |                                                                                                                                                                                                                                                                             |                                                              | Concentration Data                                                                                                                                                          | Presence Data                                                                             | Market Share Data                                                      | Details                                                                                                                                                                                                  |
| Chile<br>Durán Agüero <i>et al.</i> , 2015c [84] | Cohort of adults attending 4 different universities (first year students, mean age 20.3 to 20.8 years ( $n = 486$ )) | <input type="checkbox"/> Ace-K<br><input type="checkbox"/> Aspartame<br><input type="checkbox"/> Cyclamate<br><input type="checkbox"/> Saccharin<br><input checked="" type="checkbox"/> Steviol<br><input type="checkbox"/> Sucralose<br><input type="checkbox"/> Thaumatin | FFQ (1 week) of food and beverage products containing stevia | <input type="checkbox"/> MPL<br><input checked="" type="checkbox"/> Reported use level<br><input type="checkbox"/> Analytical data<br>Concentration declared on food labels | <input checked="" type="checkbox"/> Yes<br><input type="checkbox"/> No<br>Food label data | <input type="checkbox"/> Yes<br><input checked="" type="checkbox"/> No | <input type="checkbox"/> Deterministic<br><input checked="" type="checkbox"/> Simple Distribution<br><input type="checkbox"/> Probabilistic<br>Individual consumption data + use levels from food labels |

Ace-K = acesulfame-K; FFQ= food frequency questionnaire; MPL = maximum permitted level;  $n$  = sample size; SD = standard deviation.

**Table S5.** Methodologies Utilized for Intake Assessments Conducted for Low-/No-Calorie Sweeteners by JECFA.

| Country Reference          | Population Group Examined (n)             | Sweeteners Investigated                                                                                                                                                                                                                                                     | Food Consumption Data                                                                                                                                                                             | Chemical Data                                                                                                                                            |                                                                        |                                                                        | Assessment Model(s)                                                                                                                                                                                   |
|----------------------------|-------------------------------------------|-----------------------------------------------------------------------------------------------------------------------------------------------------------------------------------------------------------------------------------------------------------------------------|---------------------------------------------------------------------------------------------------------------------------------------------------------------------------------------------------|----------------------------------------------------------------------------------------------------------------------------------------------------------|------------------------------------------------------------------------|------------------------------------------------------------------------|-------------------------------------------------------------------------------------------------------------------------------------------------------------------------------------------------------|
|                            |                                           |                                                                                                                                                                                                                                                                             |                                                                                                                                                                                                   | Concentration Data                                                                                                                                       | Presence Data                                                          | Market Share Data                                                      | Details                                                                                                                                                                                               |
| Global<br>JECFA, 2009 [17] | Global population;<br>China; Japan;<br>US | <input type="checkbox"/> Ace-K<br><input type="checkbox"/> Aspartame<br><input type="checkbox"/> Cyclamate<br><input type="checkbox"/> Saccharin<br><input checked="" type="checkbox"/> Steviol<br><input type="checkbox"/> Sucralose<br><input type="checkbox"/> Thaumatin | GEMS/Food consumption database; <i>per capita</i> disappearance (China and Japan); <i>per capita</i> replacement (Japan, US); consumption data reported in children, and diabetic children/adults | Replacement of dietary sugars by stevia according to sweetness ratio (1:200)                                                                             | <input type="checkbox"/> Yes<br><input checked="" type="checkbox"/> No | <input type="checkbox"/> Yes<br><input checked="" type="checkbox"/> No | <input checked="" type="checkbox"/> Deterministic<br><input type="checkbox"/> Simple Distribution<br><input type="checkbox"/> Probabilistic<br><br>In addition to published dietary exposure analyses |
| Global<br>JECFA, 2010 [92] | Global population                         | <input type="checkbox"/> Ace-K<br><input type="checkbox"/> Aspartame<br><input checked="" type="checkbox"/> Cyclamate<br><input type="checkbox"/> Saccharin<br><input type="checkbox"/> Steviol<br><input type="checkbox"/> Sucralose<br><input type="checkbox"/> Thaumatin | Various dietary surveys conducted in Australia, Brazil, Germany, Italy, New Zealand, Spain, and the United Kingdom                                                                                | <input checked="" type="checkbox"/> MPL<br><input checked="" type="checkbox"/> Reported use level<br><input checked="" type="checkbox"/> Analytical data | <input type="checkbox"/> Yes<br><input checked="" type="checkbox"/> No | <input type="checkbox"/> Yes<br><input checked="" type="checkbox"/> No | Published dietary exposure analyses                                                                                                                                                                   |

Ace-K = acesulfame-K; GEMS = Global Environmental Monitoring System; JECFA = Joint FAO/WHO Expert Committee on Food Additives; NR = not reported; US = United States.
